# Supplementary material
Source: PubMed Central journal article supplement (PMC3136364)
Supplement: NIHMS302957-supplement-Supple_Data.pdf [file NIHMS302957-supplement-Supple_Data.pdf]

## Supplementary Information for:

# Genome-wide association study identifies a psoriasis susceptibility locus at *TRAF3IP2*

Eva Ellinghaus<sup>1</sup>, David Ellinghaus<sup>1</sup>, Philip E. Stuart<sup>2</sup>, Rajan P. Nair<sup>2</sup>, Sophie Debrus<sup>3</sup>, John V. Raelson<sup>3</sup>, Majid Belouchi<sup>3</sup>, H el ene Fournier<sup>3</sup>, Claudia Reinhard<sup>3</sup>, Jun Ding<sup>4</sup>, Yun Li<sup>4</sup>, Trilokraj Tejasvi<sup>2</sup>, Johann Gudjonsson<sup>2</sup>, Stefan W. Stoll<sup>2</sup>, John J. Voorhees<sup>2</sup>, Sylviane Lambert<sup>2</sup>, Stephan Weidinger<sup>5,6</sup>, Bernadette Eberlein<sup>5</sup>, Manfred Kunz<sup>7</sup>, Proton Rahman<sup>8</sup>, Dafna D. Gladman<sup>9</sup>, Christian Gieger<sup>10</sup>, H. Erich Wichmann<sup>10,11,12</sup>, Tom H. Karlsen<sup>13</sup>, Gabriele Mayr<sup>14</sup>, Mario Albrecht<sup>14</sup>, Dieter Kabelitz<sup>15</sup>, Ulrich Mrowietz<sup>6</sup>, Gonalo R. Abecasis<sup>4</sup>, James T. Elder<sup>2,16</sup>, Stefan Schreiber<sup>1</sup>, Michael Weichenthal<sup>6,†,\*</sup> and Andre Franke<sup>1,†,\*</sup>

- <sup>1</sup> Institute of Clinical Molecular Biology, Christian-Albrechts-University, 24105 Kiel, Germany
- <sup>2</sup> Department of Dermatology, University of Michigan, Ann Arbor, MI 48109, USA
- <sup>3</sup> Genizon BioSciences, Inc., St. Laurent, QC, Canada H4T 2C7
- <sup>4</sup> Department of Biostatistics, Center for Statistical Genetics, University of Michigan, Ann Arbor, MI 48109, USA
- <sup>5</sup> Department of Dermatology and Allergy, Technische Universit at M unchen, 80802 Munich, Germany
- <sup>6</sup> Department of Dermatology, University Hospital Schleswig-Holstein, Christian-Albrechts-University, 24105 Kiel, Germany
- <sup>7</sup> Comprehensive Center for Inflammation Medicine, University of L ubeck, 23538 L ubeck, Germany
- <sup>8</sup> Department of Medicine, Memorial University, St. John's, Newfoundland A1C 5B8, Canada
- <sup>9</sup> Division of Rheumatology University Toronto, Psoriatic Arthritis Program, University Health Network, Toronto, Ontario M5T 2S8, Canada
- <sup>10</sup> Institute of Epidemiology, Helmholtz Centre Munich, German Research Center for Environmental Health, 85764 Neuherberg, Germany
- <sup>11</sup> Institute of Medical Informatics, Biometry and Epidemiology, Ludwig-Maximilians-University, 81377 Munich, Germany

- <sup>12</sup> Klinikum Grosshadern, 81377 Munich, Germany
- <sup>13</sup> Medical Department, Rikshospitalet University Hospital, 0027 Oslo, Norway
- <sup>14</sup> Max Planck Institute for Informatics, 66123 Saarbrücken, Germany
- <sup>15</sup> Institute for Immunology, University Hospital Schleswig-Holstein, Christian-Albrechts-University, 24105 Kiel, Germany
- <sup>16</sup> Ann Arbor Veterans Affairs Hospital, Ann Arbor, MI 48105, USA
- \* shared senior authorship

‡ **To whom correspondence should be addressed:**

Prof. Dr. rer. nat. Andre Franke ([a.franke@mucosa.de](mailto:a.franke@mucosa.de))

Institute of Clinical Molecular Biology

Christian-Albrechts-University Kiel

Schittenhelmstr. 12

D-24105 Kiel, Germany

Tel.: +49-431-597-4138

Fax.: +49-431-597-2196

Prof. Dr. med. Michael Weichenthal ([MWeichenthal@dermatology.uni-kiel.de](mailto:MWeichenthal@dermatology.uni-kiel.de))

Department of Dermatology

University Hospital Schleswig-Holstein

Schittenhelmstr. 7,

D-24105 Kiel, Germany

Tel.: +49-431-597-1537

Fax.: +49-431-597-1606

## Supplementary Figure 1. Quality control of genome-wide association data.

**(A)** To display whether the study generated more significant results than expected by chance, the quantile-quantile (Q-Q) plot of the association test statistic was calculated for all genotyped SNPs that passed quality control ( $n=504,742$ ). For better scaling the Y-axis was limited to a maximum value of  $\chi^2=40$ . 65 SNPs with a  $\chi^2>40$  form a “plateau” along the top. **(B)** The second plot was calculated under exclusion of all SNPs within the extended MHC region (Chr 6, 25-34 Mb:  $n=2,462$  SNPs in interval), leaving 502,280 SNPs for plotting. The genomic inflation factor, based on median chi-squared was estimated to be  $\lambda=1.065$ , indicating minimal undetected population stratification or cryptic relatedness, which would result in deviation from the null across the entire distribution.

The De Finetti diagrams show genotype distributions of all quality-controlled SNPs in the control **(C)** and case **(D)** population. Any point within the de Finetti triangle corresponds to a specific combination of the three genotype frequencies  $p_{11}$ ,  $p_{12}$  and  $p_{22}$  in relation to each other: The curved red line is referred to as the Hardy-Weinberg parabola and depicts the genotype distributions strictly fulfilling Hardy-Weinberg equilibrium. The black band of genotype distributions represents an area where deviation from Hardy-Weinberg is not too strong.

**(E)** The multidimensional scaling (MDS) plot showed genuine European ancestry for the cleaned GWAS panel A which was plotted with the three distinct HapMap sample populations (see box with legend in plot) for the first two principal components. After exclusion of 17 “outliers” (see **F**) none of the samples (denoted as grey circles) showed evidence of non-European ancestry.

**(F)** Pair-wise percentage IBS (identity-by-state) values were computed, using PLINK<sup>1</sup> in order to detect “outliers” by comparing the distribution of the IBS values for each individual with the combined IBS distribution of the entire population. Two types of “outliers” were detected: 1) individuals less related to the entire population than expected were defined as those for whom  $>60\%$  of the IBS values were smaller than the median minus three times the interquartile range ( $3\times\text{IQR}$ ) of the population distribution. In this case, these individuals were removed from the population; 2) individuals with a close cognate relative in the population were defined as those who had at least one observed IBS value above the median plus  $3\times\text{IQR}$ . In this case, the member of the cognate pair with the lower call rate was removed from the population. 17 non-European “outliers” and 8 related individuals were detected and hence excluded from subsequent analyses. In the final analysis, 472 cases and 1146 controls were included.

1. Purcell, S. et al. PLINK: a tool set for whole-genome association and population-based linkage analyses. *Am J Hum Genet* **81**, 559-75 (2007).

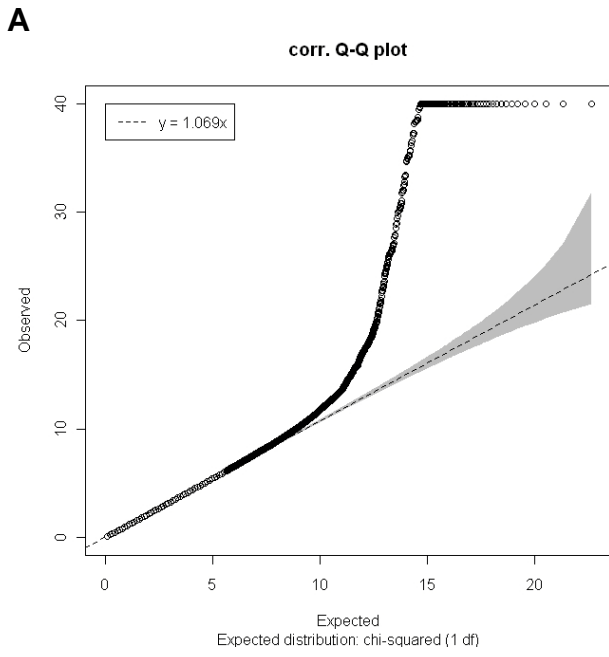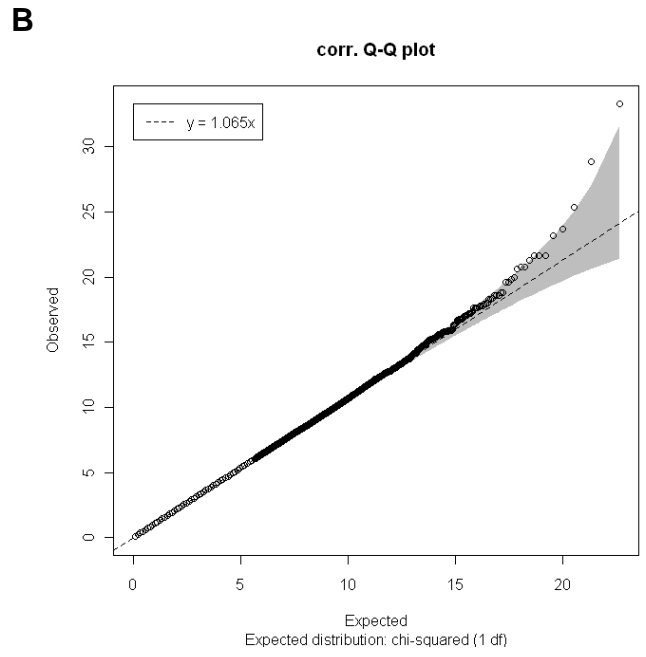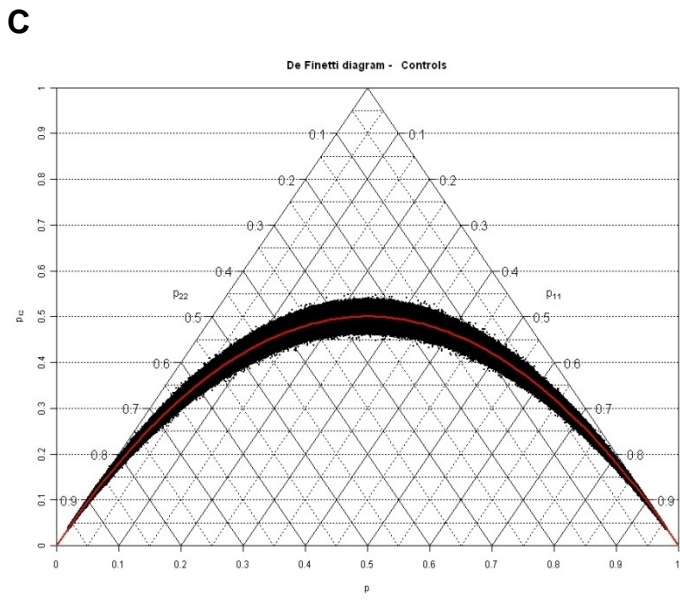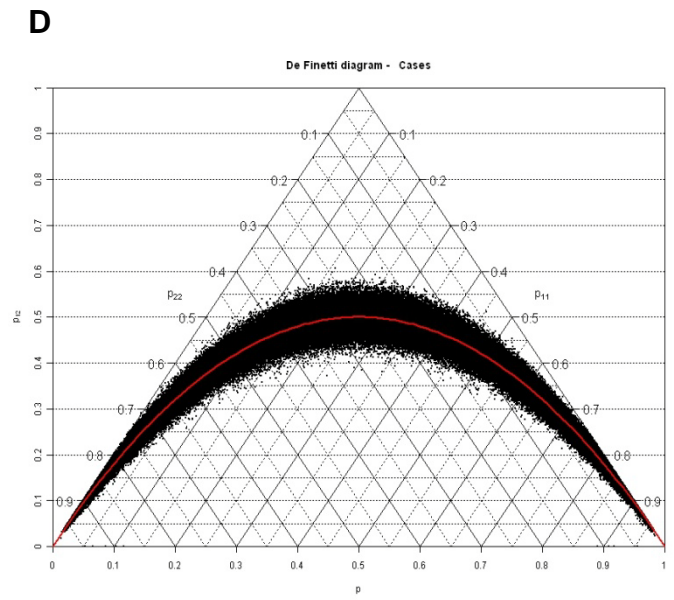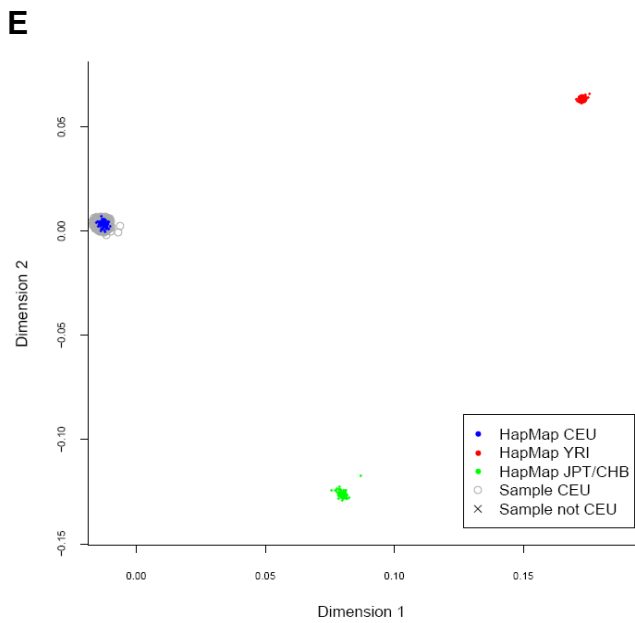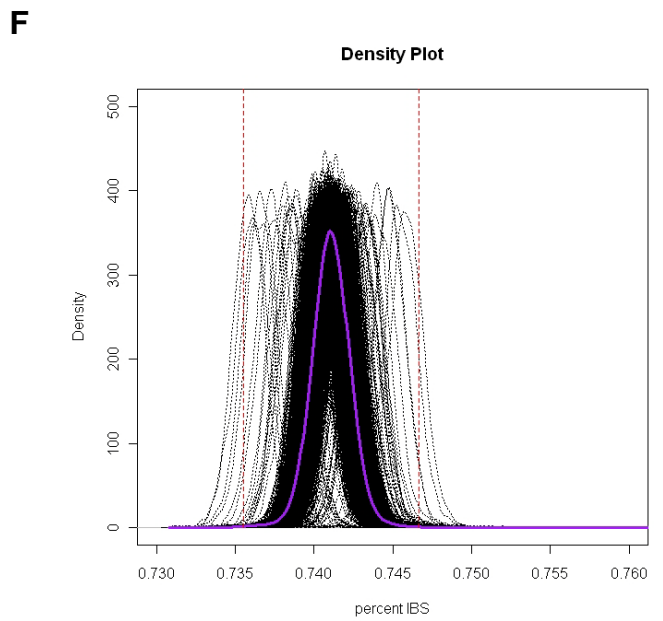

**Supplementary Figure 2. Results of association analysis.** For each SNP the negative decadic logarithm for the corresponding  $P$ -value of the allelic test of the genome-wide association study is shown, according to chromosome. **(A)** Only markers outside of the extended MHC that passed quality control criteria before clumping and had a  $P$ -value  $<0.05$  were used for plotting ( $n=130,679$ ). In addition to some of the already known loci (*IL12B*, *IL23R* and *LCE*), the novel locus *TRAF3IP2* as well as some other loci with marginal evidence for association, are highlighted by arrows. **(B)** All markers with a  $P$ -value  $<0.05$  that passed quality control before clumping were used for plotting ( $n=134,443$ ). The *HLA-C* locus stands out clearly from all other loci. Marker positions are in NCBI's build 36. The plot was created with Haploview 4.1.

**A**

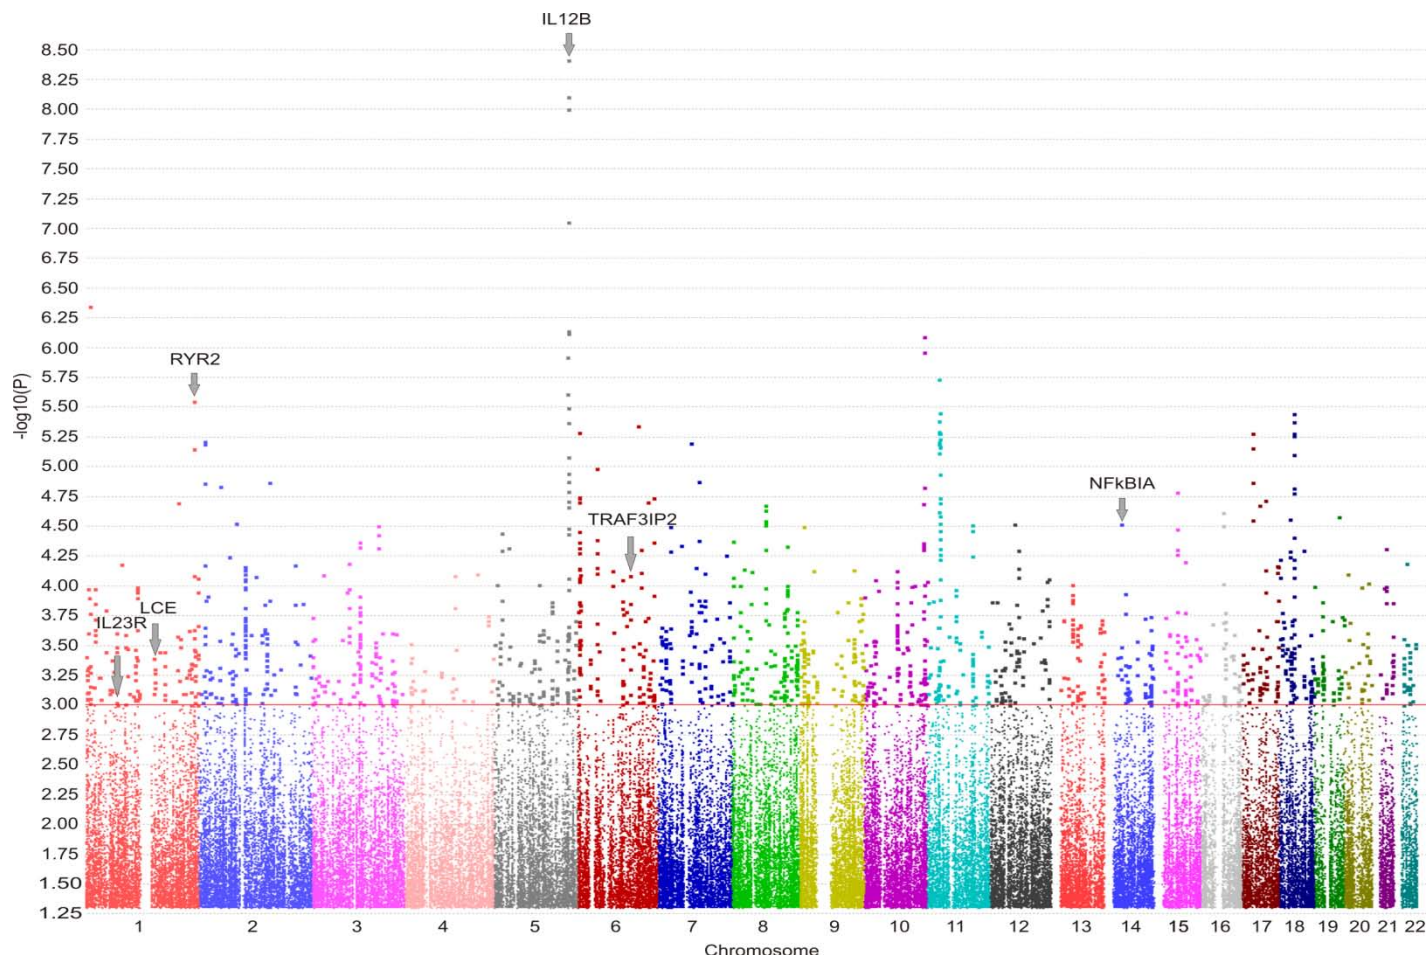

**B**

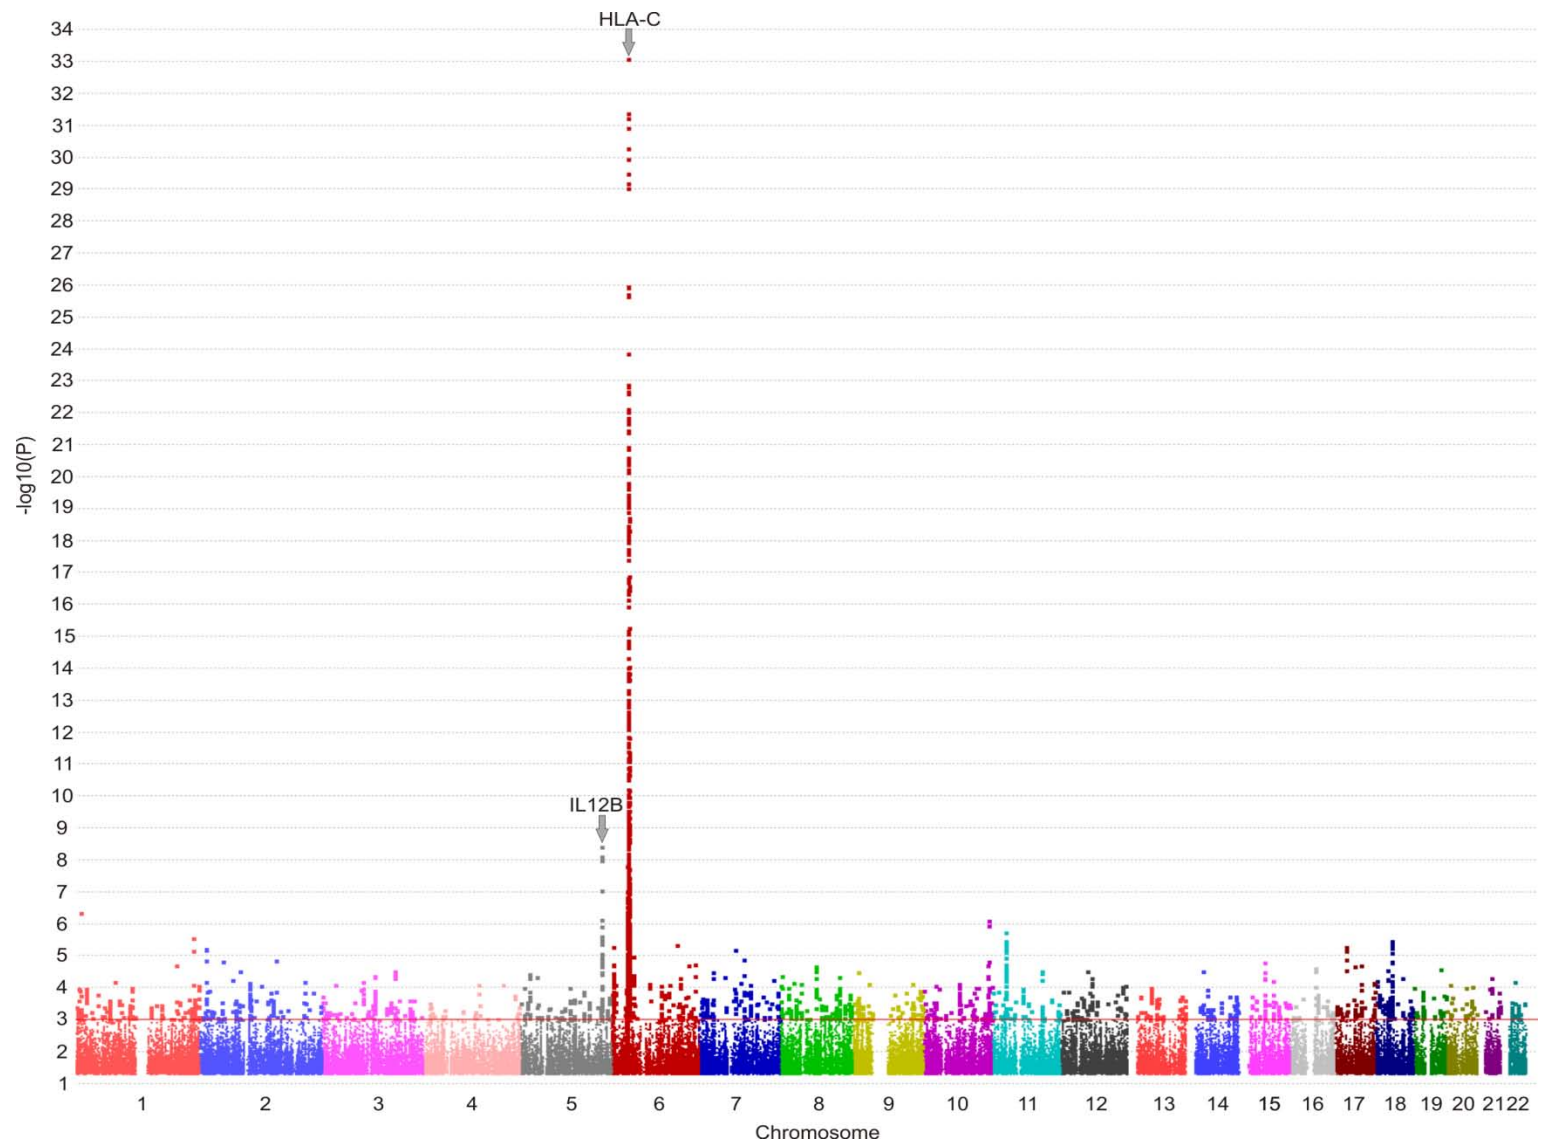

**Supplementary Figure 3. Protein sequence alignment of TRAF3IP2.** Structure-based multiple sequence alignment of the N terminal part (first 80 amino acids of the human protein) of TRAF3IP2 protein homologues (OMA Group 40491<sup>2</sup>). TRAF3IP2 is a 60 kDa (574 aa) polypeptide with a helix-loop-helix at the N terminus, a coiled-coil at the C terminus and two putative TNFR-associated factor (TRAF) binding sites, EESE (residues 38-42) and EERPA (residues 333-337). Alignment positions with 80-90% or  $\geq 90\%$  physicochemically conserved amino acids are shaded in yellow or green, respectively. The non-synonymous SNP rs33980500 causes a mutation in the protein sequence (position highlighted by red arrow) from D (aspartic acid; negative electrical charge) to N (asparagine; nonpolar). This change in charge at a conserved position might impact the three-dimensional protein structure and hence the function of TRAF3IP2. The mutation is located in a region that is 90% conserved among the different species. The high overall conservation reflects the importance of this N-terminal part of the protein.

HUMAN006296: human; MOUSE005901: house mouse; CANFA009115: dog; RATNO012065: brown rat; BOVIN006826: cattle; PANTR022727: common chimpanzee; MONDO007472: gray short-tailed opossum; MACMU005412: rhesus macaque; LOXAF019754: african bush elephant; RABIT014599: European rabbit; FELCA004587: cat; ERIEU013179: European hedgehog; OTOGA003473: northern greater galago; SPETR007633: thirteen-lined ground squirrel; TUPGB003108: northern treeshrew; MYOLU002126: little brown bat; CAVPO014479: guinea pig; MICMU008608: gray mouse lemur; OCHPR007379: american pika; PONAB005799: Sumatran orangutan; HORSE003723: horse; TURTR008666: common bottlenose dolphin; PTEVA007300: large flying fox; LAMPA005342: guanaco; DIPOR013455: ord's kangaroo rat; CHOHO003637: Hoffmann's two-toed sloth; MACEU012451: tammar wallaby; PIGXX009477: wild boar; CALJA022745: common marmoset

2. Schneider, A., Dessimoz, C. & Gonnet, G.H. OMA Browser--exploring orthologous relations across 352 complete genomes. *Bioinformatics* **23**, 2180-2 (2007).





**Supplementary Figure 4. Gene expression data for the *TRAF3IP2* locus.** Biopsies were taken from psoriasis plaques (PP) and uninvolved skin (PN) of psoriasis patients as well as from normal skin (NN) of healthy controls. The final analysis included 53 psoriatic patients and 57 controls. Study subjects did not use any systemic anti-psoriatic treatments for two weeks prior or topical anti-psoriatic treatments for one week prior to biopsy. Samples were run on Affymetrix U133 Plus 2.0 arrays according to the manufacturer's protocol. The raw data were processed using the robust multi-chip average (RMA) method adjusting the plotted RMA expression levels for batch and gender effects<sup>3</sup>. The plot includes individual measurements as well as box-plots summarizing trait distribution for the transcript. A slightly altered expression level between involved and uninvolved skin of psoriasis patients could be observed for the *TRAF3IP2* locus ( $P=2.2\times 10^{-3}$ ).

3. Gudjonsson, J.E. et al. Global gene expression analysis reveals evidence for decreased lipid biosynthesis and increased innate immunity in uninvolved psoriatic skin. *J Invest Dermatol* **129**, 2795-804 (2009).

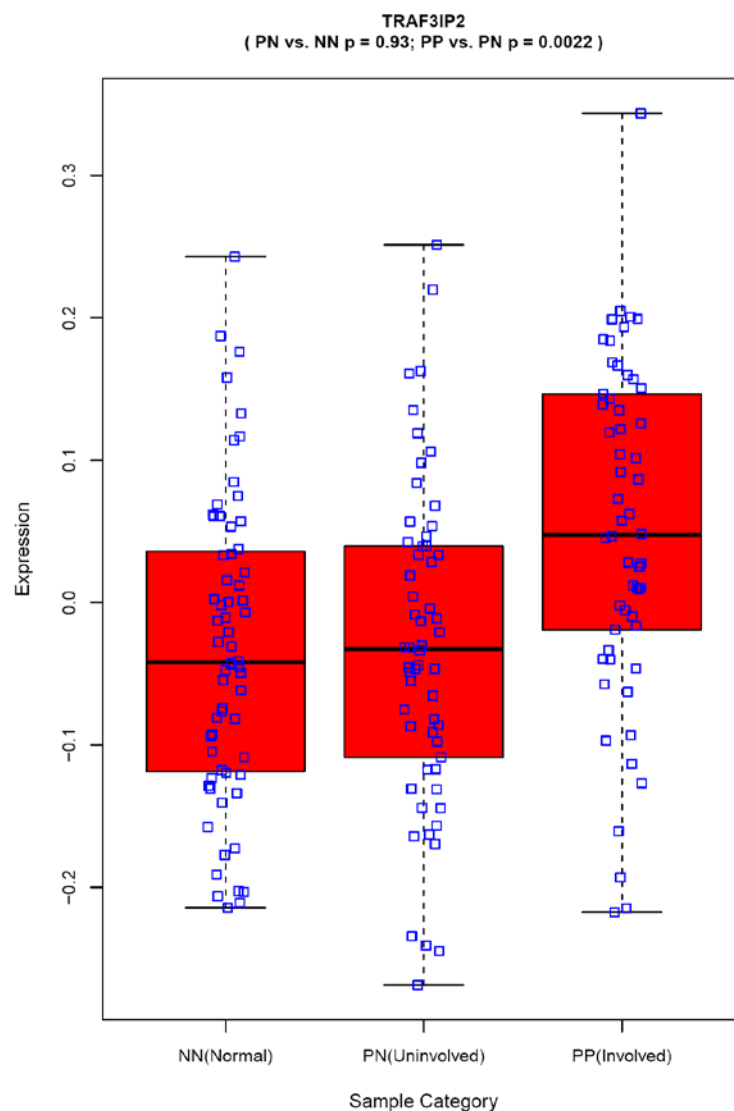

**Supplementary Figure 5. TRAF3IP2 mediated expression of  $\beta$ -defensin 2 in keratinocytes.** We silenced *TRAF3IP2* with two different small hairpin RNAs (shRNA) against this gene in (A) immortalized N-TERT keratinocytes and in (B) normal human keratinocytes (NHK). Both shRNAs caused an unequivocal knockdown of *TRAF3IP2*. We measured the effect of different stimuli (IL-17A, IL-22, TNF- $\alpha$ ) on *DEFB4* expression (encoding the protein  $\beta$ -defensin 2; hBD-2) in keratinocytes with non-silenced (shEGFP) and silenced *TRAF3IP2* (shTRAF3IP2[1] and [2]). For both cell lines, IL-17A in combination with TNF- $\alpha$  exclusively induced an increased expression of *DEFB4* in the control cells (shEGFP - IL-17A+TNF- $\alpha$ ) while *DEFB4* expression was abrogated in *TRAF3IP2* silenced cells (shTRAF3IP2[1] and [2] - IL-17A+TNF  $\alpha$ ). Target gene expression was normalized to the control gene *RPLP0* and mRNA levels were expressed as percent of *RPLP0*. The error bars indicate standard deviation (s.d.).

**A**

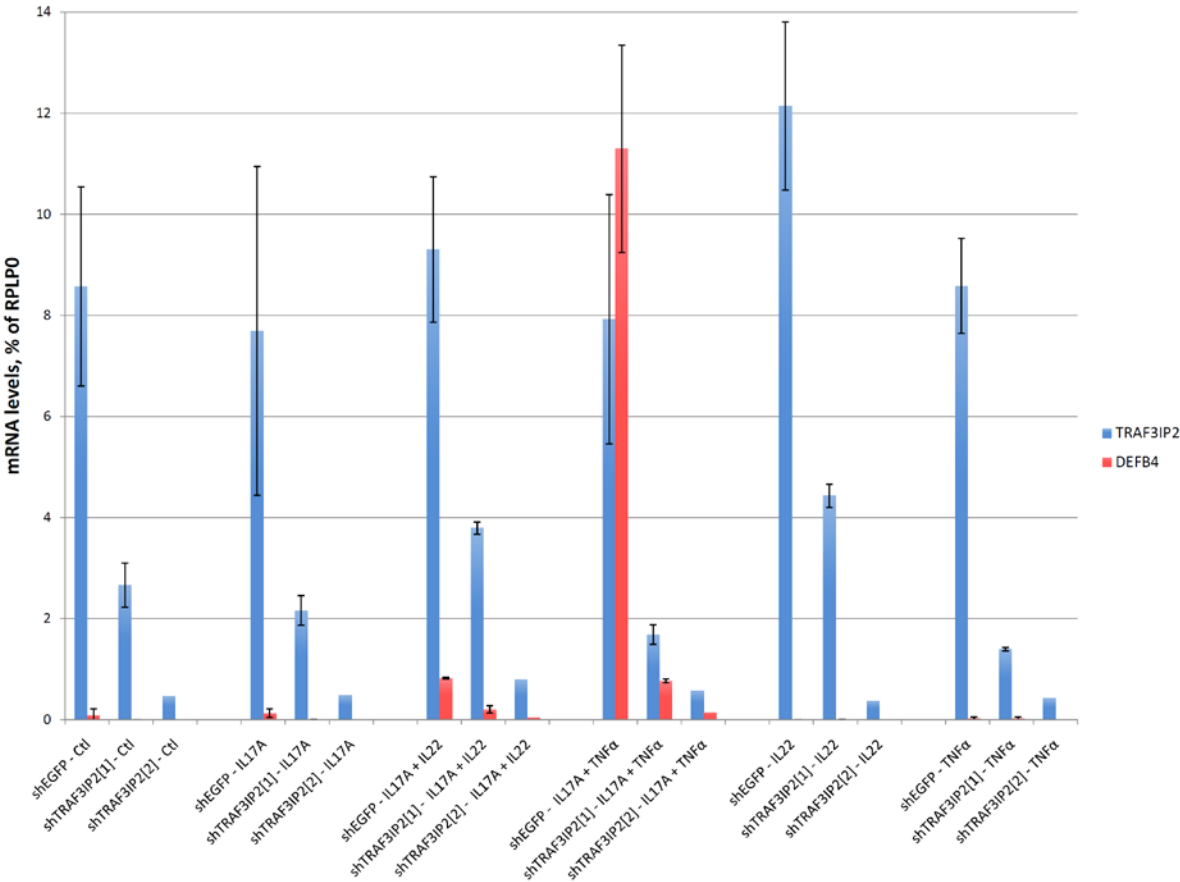

**B**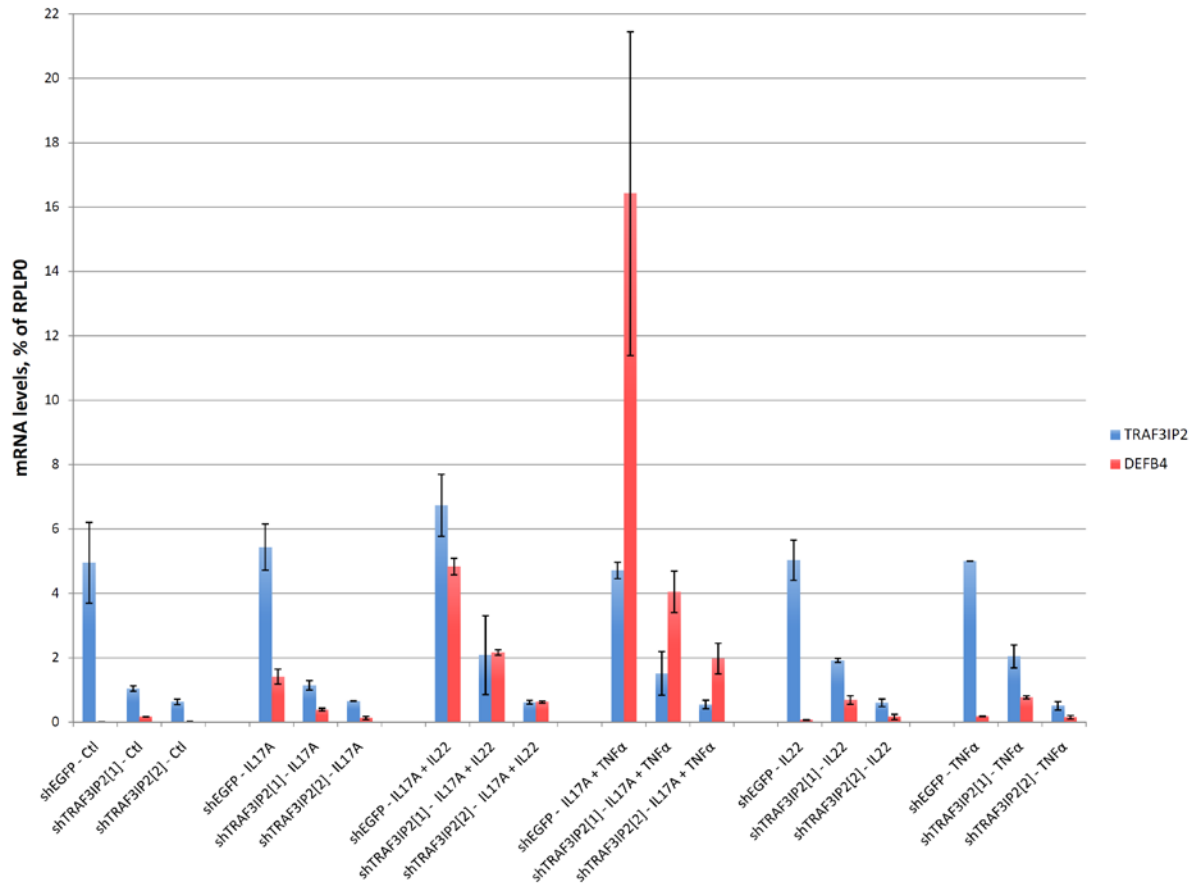

**Supplementary Table 1. Characteristics of cases/control sets used for discovery (panel A) and replication (panels B-F).**

|                                           | GWAS               | Replication          |                          |                                |                                       |                    |
|-------------------------------------------|--------------------|----------------------|--------------------------|--------------------------------|---------------------------------------|--------------------|
|                                           | Panel A<br>Germany | Panel B<br>Germany   | Panel C<br>USA<br>(CASP) | Panel D<br>Canada<br>(Genizon) | Panel E*<br>University of<br>Michigan | Panel F*<br>Canada |
| controls/cases <i>before</i> QC           | 1161/487           | 1832/690             | 1412/1375                | 996/765                        | 1661/1987                             | 1090/1282          |
| controls/cases <i>after</i> QC            | 1146/472           | 1824/681             | 1322/1303                | 994/762                        | 1661/1987                             | 1090/1282          |
| <b>Sex distribution; % Female</b>         |                    |                      |                          |                                |                                       |                    |
| <b>controls</b>                           | 57                 | 59                   | 54                       | 68                             | 60                                    | 52                 |
| <b>cases</b>                              | 47                 | 43                   | 51                       | 43                             | 54                                    | 45                 |
| <b>Age distribution; mean age (years)</b> |                    |                      |                          |                                |                                       |                    |
| at sampling<br><b>controls</b>            | 53±14.6            | 39±12.4              | 40±17.0                  | 58±16.0                        | 45±18.0                               | 54±15.6            |
| at sampling<br><b>cases</b>               | 44±14.4            | 48±16.3 <sup>a</sup> | 49±15.6                  | 45±13.0                        | 50±19.0                               | 45±13.4            |
| at onset                                  | 24±14.6            | 29±17.3 <sup>b</sup> | 26±14.5                  | 26±7.5                         | 29±17.6                               | 29±15.2            |
| <b>Disease extent</b>                     |                    |                      |                          |                                |                                       |                    |
| Psoriatic Arthritis; %                    | 8                  | 15 <sup>c</sup>      | 26                       | 18                             | 19                                    | 67                 |
| Family Psoriasis; %                       | 31                 | 32 <sup>d</sup>      | 55                       | NA                             | 57                                    | 46                 |
| IBD; %                                    | NA                 | NA                   | 4                        | 1                              | 3                                     | 3                  |

\*Only genotyped for rs13210247 and rs33980500. NA: data not available. Number of samples with missing data (if above 10% of the respective fraction): a 81, b 125, c 183, d 109.

**Supplementary Table 2. Association results of replication.** The top 147 SNPs were selected for follow-up from the GWAS panel A. These SNPs were genotyped in the German replication case-control panel B. With the American (CASP) and the French-Canadian (Genizon) case-control panels C and D, respectively, an *in silico* replication was performed. SNPs are ranked according to their *P*-values obtained in the initial GWAS. Positions (**Pos. (bp)**) are in NCBI's build 36. The number of cases and controls is shown in the top column of each subtable. **Chr.:** Chromosome. **A1** denotes the rarer allele, while **A2** is the more common allele in the GWAS analysis. **AF<sub>A1</sub>**, the allele frequency of the rarer allele, is shown for cases and for controls, respectively. In the same column, in each case below the allele frequency, the absolute genotype counts are shown (**11/12/22**), corresponding to A1A1/A1A2/A2A2. **P<sub>CCA</sub>** denotes the *P*-value of a Pearson's  $\chi^2$ -test for alleles (one degree of freedom). **LRP** is the corresponding likelihood ratio *P*-value. The odds ratio (**OR**) and the 95% confidence interval (**95% CI**) are listed for carriership of the rarer allele A1. The combined *P*-value of the meta-analysis and the direction of the effect (**Direction**) are shown for the independent replication panels B to D (**P<sub>repl.</sub>**) as well as for the GWAS-panel and the independent replication panels together (panels A-D; **P<sub>comb.</sub>**). Significant *P*-values of the combined analysis of panels B-D ( $P_{\text{repl.}} < 0.05$ ) are highlighted in bold italic. The *TRAF3IP2* lead SNP is highlighted by grey shading. For those SNPs that failed quality control in the replication, the according table cells are left blank.

|                  |             |                                               | Panel A – GWAS                        |                                        |                                           |                        |                        | Panel B                               |                                        |                                           | Panel C                                |                                           | Panel D                                |                                           | Panel B - D<br>(replication only)                |           | Panel A - D<br>(GWAS & replication)              |           |
|------------------|-------------|-----------------------------------------------|---------------------------------------|----------------------------------------|-------------------------------------------|------------------------|------------------------|---------------------------------------|----------------------------------------|-------------------------------------------|----------------------------------------|-------------------------------------------|----------------------------------------|-------------------------------------------|--------------------------------------------------|-----------|--------------------------------------------------|-----------|
|                  |             |                                               | Germany<br>472 cases<br>1146 controls |                                        |                                           |                        |                        | Germany<br>681 cases<br>1824 controls |                                        |                                           | CASP<br>1303 cases<br>1322 controls    |                                           | Genizon<br>762 cases<br>994 controls   |                                           | Combined analysis<br>2746 cases<br>4140 controls |           | Combined analysis<br>3218 cases<br>5286 controls |           |
| Chr<br>Pos. (bp) | dbSNP ID    | Nearby genes<br>(relative<br>position)        | A1<br>A2                              | AF <sub>A1</sub><br>(11/12/22)<br>Case | AF <sub>A1</sub><br>(11/12/22)<br>Control | P <sub>CCA</sub>       | LRP                    | OR<br>(95% CI)                        | AF <sub>A1</sub><br>(11/12/22)<br>Case | AF <sub>A1</sub><br>(11/12/22)<br>Control | AF <sub>A1</sub><br>(11/12/22)<br>Case | AF <sub>A1</sub><br>(11/12/22)<br>Control | AF <sub>A1</sub><br>(11/12/22)<br>Case | AF <sub>A1</sub><br>(11/12/22)<br>Control | P <sub>repl.</sub>                               | Direction | P <sub>comb.</sub>                               | Direction |
| 5                | 158,692,478 | rs2546890<br><i>IL12B</i><br>(within gene)    | G<br>A                                | 0.36<br>(61/215/196)                   | 0.46<br>(244/566/336)                     | 8.83×10 <sup>-08</sup> | 7.17×10 <sup>-08</sup> | 0.65<br>(0.56-0.76)                   | 0.38<br>(88/270/211)                   | 0.44<br>(364/847/578)                     | 0.42<br>(-/-/-)                        | 0.49<br>(-/-/-)                           | 0.45<br>(151/380/230)                  | 0.53<br>(279/487/228)                     | <b>9.07×10<sup>-15</sup></b>                     | ---       | 1.29×10 <sup>-20</sup>                           | ----      |
| 1                | 10,914,691  | rs2387698<br><i>C1orf127</i><br>(± 20 kb)     | A<br>G                                | 0.35<br>(54/219/199)                   | 0.44<br>(216/581/349)                     | 4.50×10 <sup>-07</sup> | 4.21×10 <sup>-07</sup> | 0.67<br>(0.57-0.78)                   | 0.41<br>(89/277/200)                   | 0.42<br>(290/943/576)                     | ---                                    | ---                                       | 0.39<br>(115/365/281)                  | 0.38<br>(156/443/393)                     | 0.78                                             | -?+       | 3.92×10 <sup>-03</sup>                           | -?+       |
| 11               | 26,561,907  | rs12295638<br><i>TMEM16C</i><br>(within gene) | C<br>T                                | 0.14<br>(10/116/346)                   | 0.09<br>(8/186/952)                       | 1.84×10 <sup>-06</sup> | 4.16×10 <sup>-06</sup> | 1.75<br>(1.39-2.2)                    | 0.08<br>(6/77/487)                     | 0.09<br>(12/296/1476)                     | 0.10<br>(12/237/1027)                  | 0.11<br>(19/242/1060)                     | 0.10<br>(5/140/616)                    | 0.09<br>(7/175/812)                       | 0.53                                             | ++        | 0.13                                             | +++       |
| 1                | 235,345,148 | rs2485558<br><i>RYR2</i><br>(within gene)     | G<br>C                                | 0.31<br>(52/194/226)                   | 0.24<br>(58/423/665)                      | 2.81×10 <sup>-06</sup> | 4.83×10 <sup>-06</sup> | 1.49<br>(1.26-1.76)                   | 0.24<br>(36/207/328)                   | 0.23<br>(93/628/1077)                     | 0.23<br>(-/-/-)                        | 0.21<br>(-/-/-)                           | 0.26<br>(-/-/-)                        | 0.24<br>(-/-/-)                           | <b>0.01</b>                                      | +++       | 1.53×10 <sup>-05</sup>                           | ++++      |
| 18               | 32,217,202  | rs9963077<br><i>FHOD3</i><br>(within gene)    | C<br>T                                | 0.33<br>(51/207/214)                   | 0.41<br>(202/543/401)                     | 3.55×10 <sup>-06</sup> | 6.53×10 <sup>-06</sup> | 0.69<br>(0.59-0.81)                   | 0.38<br>(94/248/230)                   | 0.37<br>(238/841/719)                     | 0.38<br>(-/-/-)                        | 0.39<br>(-/-/-)                           | 0.37<br>(-/-/-)                        | 0.39<br>(-/-/-)                           | 0.81                                             | +++       | 0.025                                            | ---       |
| 6                | 127,635,257 | rs1013640<br><i>RNF146</i><br>(within gene)   | A<br>G                                | 0.06<br>(1/54/417)                     | 0.03<br>(0/60/1086)                       | 4.55×10 <sup>-06</sup> | ---                    | 2.34<br>(1.61-3.39)                   | 0.03<br>(0/29/545)                     | 0.03<br>(2/101/1693)                      | ---                                    | ---                                       | 0.02<br>(0/31/731)                     | 0.03<br>(1/53/940)                        | 0.16                                             | -?-       | 0.22                                             | +?-       |
| 17               | 21,641,670  | rs17052344<br>gene desert                     | A<br>G                                | 0.30<br>(41/201/230)                   | 0.22<br>(53/407/686)                      | 5.23×10 <sup>-06</sup> | 1.11×10 <sup>-11</sup> | 1.48<br>(1.25-1.76)                   | 0.22<br>(33/196/343)                   | 0.21<br>(77/602/1117)                     | 0.23<br>(70/444/761)                   | 0.23<br>(71/457/788)                      | 0.25<br>(-/-/-)                        | 0.23<br>(-/-/-)                           | 0.20                                             | +++       | 1.71×10 <sup>-03</sup>                           | ++++      |
| 11               | 26,613,666  | rs12577224<br><i>TMEM16C</i><br>(within gene) | T<br>C                                | 0.21<br>(18/159/295)                   | 0.28<br>(93/464/589)                      | 5.88×10 <sup>-06</sup> | 4.33×10 <sup>-06</sup> | 0.66<br>(0.55-0.79)                   | 0.27<br>(44/226/300)                   | 0.28<br>(129/730/935)                     | 0.27<br>(-/-/-)                        | 0.29<br>(-/-/-)                           | 0.70<br>(-/-/-)                        | 0.70<br>(-/-/-)                           | 0.34                                             | ---       | 4.68×10 <sup>-03</sup>                           | ----      |
| 2                | 13,022,673  | rs16859555<br>gene desert                     | A<br>G                                | 0.13<br>(12/96/364)                    | 0.08<br>(7/161/978)                       | 6.14×10 <sup>-06</sup> | 4.58×10 <sup>-05</sup> | 1.75<br>(1.37-2.24)                   | 0.09<br>(1/96/476)                     | 0.09<br>(21/292/1476)                     | 0.10<br>(-/-/-)                        | 0.10<br>(-/-/-)                           | 0.10<br>(7/141/614)                    | 0.11<br>(10/200/782)                      | 0.75                                             | -+        | 0.09                                             | ++        |
| 7                | 71,142,370  | rs10280768<br><i>CALN1</i><br>(within gene)   | G<br>T                                | 0.24<br>(21/183/268)                   | 0.32<br>(112/502/532)                     | 6.30×10 <sup>-06</sup> | 6.07×10 <sup>-06</sup> | 0.67<br>(0.56-0.8)                    | 0.30<br>(56/239/277)                   | 0.31<br>(167/783/853)                     | 0.28<br>(-/-/-)                        | 0.28<br>(-/-/-)                           | 0.32<br>(-/-/-)                        | 0.29<br>(-/-/-)                           | 0.74                                             | -+        | 0.09                                             | ---       |
| 11               | 26,649,543  | rs7101498<br><i>SLC5A12</i><br>(within gene)  | C<br>T                                | 0.30<br>(48/187/237)                   | 0.22<br>(65/385/696)                      | 6.83×10 <sup>-06</sup> | 1.55×10 <sup>-05</sup> | 1.48<br>(1.25-1.75)                   | 0.22<br>(26/193/356)                   | 0.22<br>(89/603/1101)                     | 0.32<br>(-/-/-)                        | 0.31<br>(-/-/-)                           | 0.31<br>(-/-/-)                        | 0.30<br>(-/-/-)                           | 0.15                                             | +++       | 1.14×10 <sup>-03</sup>                           | ++++      |
| 5                | 158,705,160 | rs953861<br><i>IL12B</i><br>(± 20 kb)         | G<br>A                                | 0.23<br>(26/165/281)                   | 0.17<br>(31/317/798)                      | 1.60×10 <sup>-05</sup> | 2.73×10 <sup>-05</sup> | 1.51<br>(1.25-1.82)                   | 0.22<br>(28/198/347)                   | 0.18<br>(46/559/1217)                     | 0.22<br>(-/-/-)                        | 0.17<br>(-/-/-)                           | 0.21<br>(29/256/477)                   | 0.14<br>(24/239/731)                      | <b>6.50×10<sup>-14</sup></b>                     | +++       | 6.21×10 <sup>-18</sup>                           | ++++      |
| 6                | 40,833,805  | rs9380990<br>gene desert                      | T<br>C                                | 0.29<br>(41/194/237)                   | 0.22<br>(62/381/703)                      | 1.03×10 <sup>-05</sup> | 2.60×10 <sup>-05</sup> | 1.47<br>(1.24-1.74)                   | 0.24<br>(35/203/337)                   | 0.25<br>(108/661/1020)                    | 0.25<br>(-/-/-)                        | 0.24<br>(-/-/-)                           | 0.19<br>(-/-/-)                        | 0.23<br>(-/-/-)                           | 0.47                                             | -+        | 0.20                                             | ++        |
| 7                | 87,765,328  | rs10263111<br><i>STEAP4</i><br>(within gene)  | C<br>G                                | 0.39<br>(72/221/179)                   | 0.47<br>(256/567/323)                     | 1.32×10 <sup>-05</sup> | 1.62×10 <sup>-05</sup> | 0.71<br>(0.61-0.83)                   | 0.45<br>(118/276/174)                  | 0.43<br>(328/875/582)                     | 0.45<br>(-/-/-)                        | 0.48<br>(-/-/-)                           | 0.53<br>(-/-/-)                        | 0.50<br>(-/-/-)                           | 0.82                                             | ++        | 0.09                                             | ++        |
| 15               | 48,159,823  | rs7177318<br><i>ATP8B4</i><br>(within gene)   | A<br>G                                | 0.32<br>(53/201/218)                   | 0.41<br>(192/546/408)                     | 1.64×10 <sup>-05</sup> | 1.98×10 <sup>-05</sup> | 0.70<br>(0.6-0.83)                    | 0.38<br>(79/271/216)                   | 0.40<br>(288/869/632)                     | 0.40<br>(-/-/-)                        | 0.40<br>(-/-/-)                           | 0.44<br>(146/373/243)                  | 0.42<br>(166/497/331)                     | 0.59                                             | -+        | 0.018                                            | ---       |
| 6                | 1,388,897   | rs9501722<br><i>FOXP2</i><br>(± 50 kb)        | G<br>A                                | 0.48<br>(116/219/137)                  | 0.40<br>(180/548/418)                     | 1.82×10 <sup>-05</sup> | 3.11×10 <sup>-05</sup> | 1.40<br>(1.2-1.63)                    | 0.42<br>(97/299/171)                   | 0.43<br>(336/868/586)                     | 0.42<br>(220/633/422)                  | 0.44<br>(256/657/407)                     | 0.42<br>(-/-/-)                        | 0.43<br>(-/-/-)                           | 0.10                                             | ---       | 0.70                                             | ++        |
| 6                | 161,889,299 | rs17651312<br><i>PARK2</i><br>(within gene)   | A<br>G                                | 0.13<br>(4/115/353)                    | 0.08<br>(3/180/963)                       | 1.83×10 <sup>-05</sup> | 8.17×10 <sup>-06</sup> | 1.69<br>(1.33-2.15)                   | 0.10<br>(7/101/464)                    | 0.09<br>(21/286/1489)                     | 0.10<br>(-/-/-)                        | 0.11<br>(-/-/-)                           | 0.07<br>(-/-/-)                        | 0.07<br>(-/-/-)                           | 0.86                                             | ++        | 0.09                                             | +++       |
| 17               | 50,205,854  | rs2958907<br>gene desert                      | C<br>T                                | 0.12<br>(8/94/370)                     | 0.18<br>(33/341/772)                      | 1.92×10 <sup>-05</sup> | 9.12×10 <sup>-06</sup> | 0.61<br>(0.49-0.77)                   | 0.17<br>(20/158/396)                   | 0.16<br>(35/512/1241)                     | 0.18<br>(-/-/-)                        | 0.17<br>(-/-/-)                           | 0.16<br>(-/-/-)                        | 0.18<br>(-/-/-)                           | 0.99                                             | ++        | 0.06                                             | ++        |
| 6                | 149,198,304 | rs17663626<br><i>UST</i><br>(within gene)     | T<br>C                                | 0.14<br>(7/117/348)                    | 0.09<br>(11/182/953)                      | 1.98×10 <sup>-05</sup> | 3.59×10 <sup>-05</sup> | 1.66<br>(1.31-2.09)                   | 0.10<br>(7/100/463)                    | 0.10<br>(23/323/1446)                     | 0.10<br>(19/218/1042)                  | 0.10<br>(21/232/1069)                     | 0.11<br>(7/156/599)                    | 0.11<br>(9/200/785)                       | 0.87                                             | ++        | 0.09                                             | +++       |
| 1                | 201,340,419 | rs3898276<br><i>MYOG</i><br>(± 20 kb)         | C<br>A                                | 0.11<br>(5/94/373)                     | 0.07<br>(4/142/1000)                      | 2.01×10 <sup>-05</sup> | 3.07×10 <sup>-05</sup> | 1.76<br>(1.35-2.29)                   | 0.08<br>(2/79/486)                     | 0.07<br>(3/254/1535)                      | ---                                    | ---                                       | 0.08<br>(5/119/638)                    | 0.08<br>(5/149/840)                       | 0.42                                             | +?+       | 3.38×10 <sup>-03</sup>                           | +++       |
| 10               | 125,929,581 | rs10901570<br>gene desert                     | T<br>C                                | 0.16<br>(7/135/330)                    | 0.22<br>(61/393/692)                      | 2.03×10 <sup>-05</sup> | 3.12×10 <sup>-05</sup> | 0.65<br>(0.53-0.79)                   | 0.20<br>(23/188/365)                   | 0.20<br>(76/555/1165)                     | 0.22<br>(-/-/-)                        | 0.20<br>(-/-/-)                           | 0.18<br>(-/-/-)                        | 0.19<br>(-/-/-)                           | 0.56                                             | ++        | 0.18                                             | ++        |
| 17               | 37,799,296  | rs11079043<br><i>PTRF, STAT3</i><br>(± 10 kb) | T<br>C                                | 0.29<br>(35/204/233)                   | 0.22<br>(53/398/695)                      | 2.11×10 <sup>-05</sup> | 7.17×10 <sup>-08</sup> | 1.45<br>(1.22-1.72)                   | 0.28<br>(46/239/283)                   | 0.28<br>(140/722/930)                     | 0.22<br>(-/-/-)                        | 0.22<br>(-/-/-)                           | 0.22<br>(-/-/-)                        | 0.23<br>(-/-/-)                           | 0.91                                             | ++        | 0.08                                             | +++       |
| 16               | 48,151,027  | rs746158<br><i>ZNF423</i><br>(within gene)    | C<br>T                                | 0.41<br>(76/233/163)                   | 0.49<br>(281/560/305)                     | 2.44×10 <sup>-05</sup> | 4.21×10 <sup>-07</sup> | 0.72<br>(0.62-0.84)                   | 0.46<br>(120/288/156)                  | 0.45<br>(370/860/553)                     | 0.47<br>(276/658/343)                  | 0.47<br>(290/669/361)                     | 0.44<br>(143/387/232)                  | 0.45<br>(196/508/290)                     | 0.78                                             | ++        | 0.11                                             | ++        |
| 18               | 23,678,519  | rs4401120<br>gene desert                      | G<br>C                                | 0.18<br>(16/142/314)                   | 0.25<br>(74/432/640)                      | 2.75×10 <sup>-05</sup> | 4.16×10 <sup>-06</sup> | 0.67<br>(0.55-0.81)                   | 0.25<br>(29/224/319)                   | 0.24<br>(99/668/1030)                     | 0.27<br>(-/-/-)                        | 0.27<br>(-/-/-)                           | 0.31<br>(-/-/-)                        | 0.31<br>(-/-/-)                           | 0.80                                             | +++       | 0.11                                             | +++       |
| 14               | 34,908,987  | rs2145623<br><i>NFKBIA</i><br>(± 50 kb)       | C<br>G                                | 0.34<br>(45/233/194)                   | 0.27<br>(87/444/615)                      | 3.01×10 <sup>-05</sup> | 4.83×10 <sup>-06</sup> | 1.41<br>(1.2-1.66)                    | 0.33<br>(52/253/260)                   | 0.30<br>(174/714/903)                     | 0.30<br>(108/553/612)                  | 0.28<br>(84/561/671)                      | 0.28<br>(-/-/-)                        | 0.26<br>(-/-/-)                           | <b>2.29×10<sup>-03</sup></b>                     | +++       | 5.01×10 <sup>-06</sup>                           | ++++      |
| 12               | 53,346,493  | rs7960640<br><i>DCD</i><br>(± 20 kb)          | T<br>C                                | 0.12<br>(5/105/362)                    | 0.08<br>(4/165/977)                       | 3.04×10 <sup>-05</sup> | 6.53×10 <sup>-06</sup> | 1.69<br>(1.32-2.17)                   | 0.08<br>(7/87/481)                     | 0.09<br>(10/295/1485)                     | 0.10<br>(12/223/1038)                  | 0.09<br>(9/232/1076)                      | 0.10<br>(-/-/-)                        | 0.10<br>(-/-/-)                           | 0.86                                             | -+        | 0.10                                             | ++        |

|                  |             | Panel A – GWAS                         |                                  |                                        |                                           |           |                        |                        | Panel B                                |                                           |                                        | Panel C                                   |                                        | Panel D                                   |             | Panel B - D<br>(replication only)<br>Combined analysis |             | Panel A - D<br>(GWAS & replication)<br>Combined analysis |      |
|------------------|-------------|----------------------------------------|----------------------------------|----------------------------------------|-------------------------------------------|-----------|------------------------|------------------------|----------------------------------------|-------------------------------------------|----------------------------------------|-------------------------------------------|----------------------------------------|-------------------------------------------|-------------|--------------------------------------------------------|-------------|----------------------------------------------------------|------|
|                  |             | Germany<br>472 cases<br>1146 controls  |                                  |                                        |                                           |           |                        |                        | Germany<br>681 cases<br>1824 controls  |                                           |                                        | CASP<br>1303 cases<br>1322 controls       |                                        | Genizon<br>762 cases<br>994 controls      |             | 2746 cases<br>4140 controls                            |             | 3218 cases<br>5286 controls                              |      |
| Chr<br>Pos. (bp) | dbSNP ID    | Nearby genes<br>(relative<br>position) | A1<br>A2                         | AF <sub>A1</sub><br>(11/12/22)<br>Case | AF <sub>A1</sub><br>(11/12/22)<br>Control | $P_{CCA}$ | <i>LRP</i>             | OR<br>(95% CI)         | AF <sub>A1</sub><br>(11/12/22)<br>Case | AF <sub>A1</sub><br>(11/12/22)<br>Control | AF <sub>A1</sub><br>(11/12/22)<br>Case | AF <sub>A1</sub><br>(11/12/22)<br>Control | AF <sub>A1</sub><br>(11/12/22)<br>Case | AF <sub>A1</sub><br>(11/12/22)<br>Control | $P_{repl.}$ | Direction                                              | $P_{comb.}$ | Direction                                                |      |
| 11               | 97,645,772  | rs1941784                              | gene desert                      | A                                      | 0.42                                      | 0.34      | 3.06x10 <sup>-05</sup> | —                      | 1.39                                   | 0.39                                      | 0.38                                   | 0.37                                      | 0.39                                   | 0.41                                      | 0.41        | 0.52                                                   | +++         | 0.22                                                     | +++  |
| 3                | 141,446,665 | rs4234484                              | <i>CLSTN2</i><br>(within gene)   | T                                      | 0.02                                      | 0.06      | 3.10x10 <sup>-05</sup> | 2.56x10 <sup>-06</sup> | 0.38                                   | 0.03                                      | 0.03                                   | 0.04                                      | 0.03                                   | 0.03                                      | 0.03        | 0.12                                                   | ++          | 0.67                                                     | +++  |
| 9                | 9,041,277   | rs324459                               | <i>PTPRD</i><br>(within gene)    | A                                      | 0.28                                      | 0.36      | 3.15x10 <sup>-05</sup> | 1.11x10 <sup>-11</sup> | 0.70                                   | 0.33                                      | 0.33                                   | 0.34                                      | 0.33                                   | 0.35                                      | 0.37        | 0.73                                                   | ++          | 0.03                                                     | +++  |
| 7                | 27,235,373  | rs12700794                             | <i>EVX1</i><br>(± 20 kb)         | A                                      | 0.23                                      | 0.17      | 3.18x10 <sup>-05</sup> | 4.33x10 <sup>-06</sup> | 1.48                                   | 0.19                                      | 0.17                                   | 0.20                                      | 0.20                                   | 0.15                                      | 0.17        | 0.77                                                   | ++          | 0.038                                                    | +++  |
| 5                | 17,522,464  | rs2459789                              | gene desert                      | T                                      | 0.22                                      | 0.16      | 3.61x10 <sup>-05</sup> | 4.58x10 <sup>-05</sup> | 1.49                                   | 0.18                                      | 0.17                                   | 0.20                                      | 0.19                                   | 0.21                                      | 0.21        | 0.56                                                   | ++          | 0.02                                                     | +++  |
| 3                | 102,020,586 | rs9879088                              | <i>ABI3BP</i><br>(within gene)   | A                                      | 0.42                                      | 0.35      | 4.25x10 <sup>-05</sup> | 1.55x10 <sup>-05</sup> | 1.38                                   | 0.37                                      | 0.36                                   | 0.36                                      | 0.35                                   | 0.37                                      | 0.35        | 0.29                                                   | +++         | 6.34x10 <sup>-03</sup>                                   | ++++ |
| 6                | 161,899,254 | rs6901951                              | <i>PARK2</i><br>(within gene)    | G                                      | 0.18                                      | 0.12      | 4.25x10 <sup>-05</sup> | 2.73x10 <sup>-05</sup> | 1.54                                   | 0.16                                      | 0.16                                   | 0.16                                      | 0.16                                   | 0.12                                      | 0.13        | 0.92                                                   | ++          | 0.09                                                     | +++  |
| 7                | 50,249,131  | rs12669163                             | gene desert                      | C                                      | 0.27                                      | 0.21      | 4.59x10 <sup>-05</sup> | 2.60x10 <sup>-05</sup> | 1.44                                   | 0.23                                      | 0.23                                   | —                                         | —                                      | 0.23                                      | 0.21        | 0.70                                                   | -?+         | 0.01                                                     | +?+  |
| 8                | 117,643,793 | rs6988499                              | gene desert                      | C                                      | 0.41                                      | 0.34      | 4.63x10 <sup>-05</sup> | 1.62x10 <sup>-05</sup> | 1.38                                   | 0.34                                      | 0.35                                   | 0.34                                      | 0.33                                   | 0.34                                      | 0.31        | 0.43                                                   | ++          | 0.01                                                     | +++  |
| 5                | 31,868,376  | rs12697261                             | <i>PDZD2</i><br>(within gene)    | T                                      | 0.49                                      | 0.41      | 4.75x10 <sup>-05</sup> | 2.31x10 <sup>-06</sup> | 1.37                                   | 0.42                                      | 0.44                                   | 0.46                                      | 0.45                                   | 0.45                                      | 0.45        | 0.81                                                   | ++          | 0.12                                                     | +++  |
| 6                | 2,958,487   | rs9378759                              | <i>NQO2</i><br>(within gene)     | T                                      | 0.27                                      | 0.20      | 4.81x10 <sup>-05</sup> | 3.23x10 <sup>-05</sup> | 1.44                                   | 0.23                                      | 0.21                                   | 0.20                                      | 0.20                                   | 0.22                                      | 0.24        | 0.73                                                   | ++          | 0.14                                                     | +++  |
| 21               | 27,236,500  | rs2830590                              | <i>ADAMTS5</i><br>(within gene)  | C                                      | 0.23                                      | 0.30      | 4.89x10 <sup>-05</sup> | 1.98x10 <sup>-05</sup> | 0.70                                   | 0.28                                      | 0.27                                   | 0.26                                      | 0.25                                   | 0.25                                      | 0.26        | 0.92                                                   | ++          | 0.06                                                     | +++  |
| 15               | 48,094,708  | rs2899446                              | <i>ATP8B4</i><br>(within gene)   | G                                      | 0.46                                      | 0.38      | 4.90x10 <sup>-05</sup> | 3.11x10 <sup>-05</sup> | 1.37                                   | 0.44                                      | 0.41                                   | 0.39                                      | 0.41                                   | 0.37                                      | 0.37        | 0.87                                                   | ++          | 0.06                                                     | +++  |
| 6                | 133,959,061 | rs2636605                              | gene desert                      | C                                      | 0.30                                      | 0.38      | 4.91x10 <sup>-05</sup> | 8.17x10 <sup>-06</sup> | 0.72                                   | 0.36                                      | 0.35                                   | 0.36                                      | 0.36                                   | 0.38                                      | 0.36        | 0.88                                                   | ++          | 0.06                                                     | +++  |
| 18               | 53,938,048  | rs4940643                              | <i>NEDD4L</i><br>(within gene)   | A                                      | 0.10                                      | 0.06      | 5.00x10 <sup>-05</sup> | 9.12x10 <sup>-06</sup> | 1.75                                   | 0.08                                      | 0.08                                   | —                                         | —                                      | 0.05                                      | 0.06        | 0.35                                                   | -?          | 0.18                                                     | +?+  |
| 7                | 146,170,289 | rs2727632                              | <i>CNTNAP2</i><br>(within gene)  | A                                      | 0.39                                      | 0.47      | 5.52x10 <sup>-05</sup> | 3.59x10 <sup>-06</sup> | 0.73                                   | 0.43                                      | 0.45                                   | 0.43                                      | 0.43                                   | 0.45                                      | 0.42        | 0.58                                                   | ++          | 0.21                                                     | +++  |
| 2                | 65,660,531  | rs1641488                              | gene desert                      | C                                      | 0.16                                      | 0.22      | 5.66x10 <sup>-05</sup> | 3.07x10 <sup>-06</sup> | 0.67                                   | 0.16                                      | 0.19                                   | 0.20                                      | 0.22                                   | 0.21                                      | 0.20        | 0.05                                                   | ++          | 4.57x10 <sup>-04</sup>                                   | +++  |
| 18               | 2,400,483   | rs11873219                             | gene desert                      | G                                      | 0.14                                      | 0.09      | 5.99x10 <sup>-05</sup> | 3.12x10 <sup>-06</sup> | 1.60                                   | 0.10                                      | 0.10                                   | 0.12                                      | 0.12                                   | 0.12                                      | 0.12        | 0.53                                                   | ++          | 0.23                                                     | +++  |
| 15               | 65,481,820  | rs11071951                             | <i>IQCH</i><br>(within gene)     | C                                      | 0.54                                      | 0.46      | 6.26x10 <sup>-05</sup> | 3.20x10 <sup>-05</sup> | 1.36                                   | 0.49                                      | 0.48                                   | 0.47                                      | 0.49                                   | 0.46                                      | 0.46        | 0.51                                                   | ++          | 0.25                                                     | +++  |
| 22               | 26,290,673  | rs881459                               | gene desert                      | A                                      | 0.45                                      | 0.37      | 6.45x10 <sup>-05</sup> | —                      | 1.37                                   | 0.43                                      | 0.43                                   | 0.42                                      | 0.42                                   | 0.38                                      | 0.36        | 0.35                                                   | +++         | 9.81x10 <sup>-03</sup>                                   | ++++ |
| 3                | 78,753,263  | rs17016412                             | <i>ROBO1</i><br>(within gene)    | C                                      | 0.30                                      | 0.24      | 6.50x10 <sup>-05</sup> | 1.08x10 <sup>-04</sup> | 1.41                                   | 0.26                                      | 0.25                                   | 0.24                                      | 0.23                                   | 0.22                                      | 0.21        | 0.23                                                   | +++         | 4.65x10 <sup>-03</sup>                                   | ++++ |
| 2                | 206,521,473 | rs4675571                              | <i>FLJ20309</i><br>(± 50 kb)     | G                                      | 0.13                                      | 0.19      | 6.64x10 <sup>-05</sup> | 3.71x10 <sup>-05</sup> | 0.65                                   | 0.17                                      | 0.17                                   | 0.15                                      | 0.15                                   | 0.16                                      | 0.17        | 0.75                                                   | ++          | 0.04                                                     | +++  |
| 2                | 97,701,111  | rs11687510                             | <i>ZAP7</i><br>(within gene)     | T                                      | 0.43                                      | 0.35      | 6.89x10 <sup>-05</sup> | 4.46x10 <sup>-05</sup> | 1.37                                   | 0.42                                      | 0.40                                   | 0.32                                      | 0.33                                   | 0.34                                      | 0.33        | 0.95                                                   | ++          | 0.09                                                     | +++  |
| 7                | 81,613,491  | rs10954664                             | <i>CACNA2D1</i><br>(within gene) | C                                      | 0.48                                      | 0.40      | 6.98x10 <sup>-05</sup> | 8.41x10 <sup>-05</sup> | 1.36                                   | 0.42                                      | 0.42                                   | 0.43                                      | 0.41                                   | 0.43                                      | 0.43        | 0.34                                                   | ++          | 9.65x10 <sup>-03</sup>                                   | +++  |
| 6                | 1,369,361   | rs4317453                              | <i>FOXF2</i><br>(± 50 kb)        | A                                      | 0.42                                      | 0.35      | 7.07x10 <sup>-05</sup> | —                      | 1.37                                   | 0.34                                      | 0.36                                   | 0.35                                      | 0.36                                   | 0.34                                      | 0.36        | 0.27                                                   | ---         | 0.46                                                     | +++  |
| 6                | 1,363,159   | rs9392288                              | <i>FOXF2</i><br>(± 50 kb)        | A                                      | 0.36                                      | 0.43      | 7.17x10 <sup>-05</sup> | 5.11x10 <sup>-05</sup> | 0.73                                   | 0.45                                      | 0.42                                   | 0.42                                      | 0.41                                   | 0.47                                      | 0.44        | <b>0.018</b>                                           | +++         | 0.69                                                     | +++  |

|                  |             |                                        |                           | Panel A – GWAS                         |                                           |                       |                        |                        | Panel B                                |                                           | Panel C                                |                                           | Panel D                                |                                           | Panel B - D<br>(replication only)<br>Combined analysis |                        | Panel A - D<br>(GWAS & replication)<br>Combined analysis |                        |      |      |     |
|------------------|-------------|----------------------------------------|---------------------------|----------------------------------------|-------------------------------------------|-----------------------|------------------------|------------------------|----------------------------------------|-------------------------------------------|----------------------------------------|-------------------------------------------|----------------------------------------|-------------------------------------------|--------------------------------------------------------|------------------------|----------------------------------------------------------|------------------------|------|------|-----|
|                  |             |                                        |                           | Germany<br>472 cases<br>1146 controls  |                                           |                       |                        |                        | Germany<br>681 cases<br>1824 controls  |                                           | CASP<br>1303 cases<br>1322 controls    |                                           | Genizon<br>762 cases<br>994 controls   |                                           | 2746 cases<br>4140 controls                            |                        | 3218 cases<br>5286 controls                              |                        |      |      |     |
| Chr<br>Pos. (bp) | dbSNP ID    | Nearby genes<br>(relative<br>position) | A1<br>A2                  | AF <sub>A1</sub><br>(11/12/22)<br>Case | AF <sub>A1</sub><br>(11/12/22)<br>Control | P <sub>CCA</sub>      | LRP                    | OR<br>(95% CI)         | AF <sub>A1</sub><br>(11/12/22)<br>Case | AF <sub>A1</sub><br>(11/12/22)<br>Control | AF <sub>A1</sub><br>(11/12/22)<br>Case | AF <sub>A1</sub><br>(11/12/22)<br>Control | AF <sub>A1</sub><br>(11/12/22)<br>Case | AF <sub>A1</sub><br>(11/12/22)<br>Control | P <sub>repl.</sub>                                     | Direction              | P <sub>comb.</sub>                                       | Direction              |      |      |     |
| 2                | 97,711,518  | rs6714710                              | ZAP70<br>(within gene)    | T<br>G                                 | 0.42<br>(75/249/148)                      | 0.50<br>(298/549/299) | 7.19x10 <sup>-05</sup> | 6.61x10 <sup>-05</sup> | 0.73<br>(0.63-0.86)                    | 0.46<br>(116/281/167)                     | 0.45<br>(367/911/540)                  | —                                         | —                                      | 0.51<br>(184/397/181)                     | 0.49<br>(307/668/331)                                  | 0.51<br>(261/509/224)  | 0.52<br>(121/350/290)                                    | 0.67                   | ++   | 0.18 | +++ |
| 9                | 117,558,071 | rs7874534                              | gene desert               | T<br>C                                 | 0.45<br>(97/231/144)                      | 0.38<br>(172/519/455) | 7.36x10 <sup>-05</sup> | 1.38x10 <sup>-04</sup> | 1.36<br>(1.17-1.59)                    | 0.42<br>(95/285/189)                      | 0.42<br>(277/936/575)                  | —                                         | —                                      | 0.39<br>(121/350/290)                     | 0.39<br>(154/474/366)                                  | 0.97                   | +?-                                                      | 0.04                   | +++? |      |     |
| 6                | 73,294,472  | rs16882514                             | gene desert               | C<br>T                                 | 0.06<br>(0/60/412)                        | 0.03<br>(0/75/1071)   | 7.45x10 <sup>-05</sup> | 8.43x10 <sup>-05</sup> | 0.06<br>(1.41-2.83)                    | 0.05<br>(0/60/514)                        | 0.05<br>(6/157/1636)                   | —                                         | —                                      | 0.06<br>(-/-)                             | 0.06<br>(-/-)                                          | 0.29                   | +++                                                      | 7.20x10 <sup>-03</sup> | ++++ |      |     |
| 10               | 69,328,657  | rs10997866                             | SIRT1<br>(within gene)    | A<br>G                                 | 0.39<br>(67/233/172)                      | 0.32<br>(118/488/540) | 7.46x10 <sup>-05</sup> | 1.34x10 <sup>-04</sup> | 1.37<br>(1.17-1.61)                    | 0.39<br>(99/247/230)                      | 0.37<br>(239/856/697)                  | —                                         | —                                      | 0.34<br>(-/-)                             | 0.34<br>(-/-)                                          | 0.26                   | +++                                                      | 6.16x10 <sup>-03</sup> | ++++ |      |     |
| 7                | 101,444,622 | rs1060697                              | CUX1<br>(within gene)     | T<br>C                                 | 0.16<br>(12/128/332)                      | 0.22<br>(62/387/697)  | 7.84x10 <sup>-05</sup> | 5.90x10 <sup>-05</sup> | 0.67<br>(0.55-0.82)                    | 0.17<br>(17/160/387)                      | 0.20<br>(72/577/1136)                  | —                                         | —                                      | 0.21<br>(-/-)                             | 0.20<br>(-/-)                                          | 0.19                   | ++                                                       | 3.79x10 <sup>-03</sup> | ---  |      |     |
| 4                | 156,237,223 | rs7663039                              | gene desert               | T<br>C                                 | 0.23<br>(23/170/279)                      | 0.30<br>(95/491/560)  | 7.92x10 <sup>-05</sup> | 1.91x10 <sup>-05</sup> | 0.70<br>(0.59-0.84)                    | 0.26<br>(40/205/328)                      | 0.27<br>(133/691/976)                  | —                                         | —                                      | 0.28<br>(-/-)                             | 0.29<br>(-/-)                                          | 0.45                   | -?                                                       | 6.73x10 <sup>-03</sup> | --?  |      |     |
| 20               | 8,515,519   | rs6086518                              | PLCB1<br>(within gene)    | G<br>A                                 | 0.30<br>(50/189/233)                      | 0.38<br>(160/546/440) | 7.94x10 <sup>-05</sup> | 1.04x10 <sup>-04</sup> | 0.72<br>(0.61-0.85)                    | 0.33<br>(62/251/254)                      | 0.35<br>(233/792/754)                  | —                                         | —                                      | 0.38<br>(147/606/525)                     | 0.35<br>(170/576/572)                                  | 0.89                   | ++                                                       | 0.11                   | ---  |      |     |
| 3                | 24,568,239  | rs17543143                             | gene desert               | G<br>A                                 | 0.06<br>(0/61/411)                        | 0.03<br>(0/77/1069)   | 8.03x10 <sup>-05</sup> | —                      | 1.98<br>(1.4-2.79)                     | 0.07<br>(3/74/496)                        | 0.07<br>(12/242/1547)                  | —                                         | —                                      | —                                         | —                                                      | 0.44                   | -??                                                      | 0.06                   | +??  |      |     |
| 6                | 5,324,227   | rs2432749                              | FARS2<br>(within gene)    | C<br>T                                 | 0.45<br>(94/241/137)                      | 0.38<br>(160/551/435) | 8.09x10 <sup>-05</sup> | 6.37x10 <sup>-05</sup> | 1.36<br>(1.17-1.59)                    | 0.42<br>(101/283/192)                     | 0.44<br>(371/851/586)                  | —                                         | —                                      | 0.41<br>(230/618/429)                     | 0.43<br>(234/651/437)                                  | 0.12                   | ---                                                      | 0.75                   | ---  |      |     |
| 6                | 112,029,413 | rs13210247                             | TRAF3IP2<br>(within gene) | G<br>A                                 | 0.10<br>(9/81/382)                        | 0.06<br>(6/135/1005)  | 8.17x10 <sup>-05</sup> | 2.83x10 <sup>-04</sup> | 1.70<br>(1.3-2.22)                     | 0.09<br>(7/90/472)                        | 0.07<br>(11/228/1559)                  | —                                         | —                                      | 0.91<br>(-/-)                             | 0.93<br>(-/-)                                          | 6.25x10 <sup>-06</sup> | +++                                                      | 7.31x10 <sup>-09</sup> | ++++ |      |     |
| 4                | 107,603,066 | rs17036750                             | gene desert               | C<br>T                                 | 0.05<br>(1/43/428)                        | 0.02<br>(1/48/1097)   | 8.22x10 <sup>-05</sup> | 7.45x10 <sup>-04</sup> | 2.24<br>(1.48-3.37)                    | 0.04<br>(0/36/542)                        | 0.03<br>(2/107/1700)                   | —                                         | —                                      | 0.02<br>(-/-)                             | 0.03<br>(-/-)                                          | 0.90                   | +-                                                       | 0.11                   | ---  |      |     |
| 2                | 120,877,872 | rs12623934                             | gene desert               | G<br>A                                 | 0.21<br>(20/153/299)                      | 0.15<br>(19/304/823)  | 8.37x10 <sup>-05</sup> | 1.22x10 <sup>-04</sup> | 1.48<br>(1.22-1.79)                    | 0.18<br>(23/161/387)                      | 0.19<br>(65/537/1187)                  | —                                         | —                                      | 0.18<br>(-/-)                             | 0.17<br>(-/-)                                          | 0.79                   | +-                                                       | 0.14                   | +++  |      |     |
| 8                | 3,410,499   | rs13248151                             | CSMD1<br>(within gene)    | A<br>G                                 | 0.31<br>(50/192/230)                      | 0.38<br>(166/546/434) | 8.45x10 <sup>-05</sup> | 9.36x10 <sup>-05</sup> | 0.72<br>(0.62-0.85)                    | 0.35<br>(74/252/247)                      | 0.36<br>(244/802/750)                  | —                                         | —                                      | 0.36<br>(-/-)                             | 0.37<br>(-/-)                                          | 0.74                   | +-                                                       | 0.16                   | ---  |      |     |
| 12               | 127,258,873 | rs10847569                             | gene desert               | A<br>C                                 | 0.43<br>(91/221/160)                      | 0.35<br>(136/539/471) | 8.70x10 <sup>-05</sup> | 9.91x10 <sup>-05</sup> | 1.36<br>(1.17-1.59)                    | 0.36<br>(71/261/235)                      | 0.36<br>(220/847/733)                  | —                                         | —                                      | 0.36<br>(-/-)                             | 0.35<br>(-/-)                                          | 0.58                   | +++                                                      | 0.027                  | ++++ |      |     |
| 10               | 22,907,844  | rs2031620                              | PIP4K2A<br>(within gene)  | T<br>C                                 | 0.42<br>(80/232/160)                      | 0.34<br>(145/498/503) | 8.89x10 <sup>-05</sup> | 1.08x10 <sup>-04</sup> | 1.36<br>(1.17-1.59)                    | 0.38<br>(78/279/216)                      | 0.36<br>(240/825/737)                  | —                                         | —                                      | 0.37<br>(-/-)                             | 0.35<br>(-/-)                                          | 0.11                   | +++                                                      | 1.60x10 <sup>-03</sup> | ++++ |      |     |
| 20               | 52,207,834  | rs1570669                              | CYP24A1<br>(within gene)  | G<br>A                                 | 0.30<br>(43/199/230)                      | 0.37<br>(158/538/450) | 9.48x10 <sup>-05</sup> | 1.14x10 <sup>-04</sup> | 0.72<br>(0.62-0.85)                    | 0.35<br>(77/244/254)                      | 0.36<br>(238/806/746)                  | —                                         | —                                      | 0.36<br>(183/558/537)                     | 0.33<br>(154/571/596)                                  | 0.59                   | +-                                                       | 0.22                   | ---  |      |     |
| 5                | 6,729,931   | rs1651071                              | SRD5A1<br>(± 10 kb)       | A<br>G                                 | 0.53<br>(134/236/102)                     | 0.46<br>(247/557/342) | 9.70x10 <sup>-05</sup> | 1.27x10 <sup>-04</sup> | 1.35<br>(1.16-1.57)                    | 0.48<br>(140/269/160)                     | 0.48<br>(422/853/510)                  | —                                         | —                                      | 0.48<br>(282/649/334)                     | 0.49<br>(316/651/334)                                  | 0.89                   | ++                                                       | 0.07                   | +++  |      |     |
| 10               | 108,036,628 | rs17834272                             | gene desert               | A<br>G                                 | 0.35<br>(54/221/197)                      | 0.28<br>(80/480/586)  | 9.86x10 <sup>-05</sup> | 3.54x10 <sup>-04</sup> | 1.38<br>(1.17-1.62)                    | 0.32<br>(61/247/265)                      | 0.28<br>(143/713/925)                  | —                                         | —                                      | 0.30<br>(121/527/626)                     | 0.31<br>(130/552/637)                                  | 0.17                   | +-                                                       | 3.26x10 <sup>-03</sup> | +++  |      |     |
| 19               | 1,134,851   | rs1123751                              | SBNO2<br>(± 10 kb)        | G<br>C                                 | 0.17<br>(15/134/323)                      | 0.24<br>(59/423/664)  | 1.01x10 <sup>-04</sup> | —                      | 0.68<br>(0.56-0.83)                    | 0.21<br>(19/232/378)                      | 0.20<br>(86/526/1159)                  | —                                         | —                                      | 0.22<br>(47/233/454)                      | 0.23<br>(61/328/582)                                   | 0.53                   | +?-                                                      | 0.13                   | -?-  |      |     |
| 20               | 37,965,320  | rs11086765                             | gene desert               | G<br>A                                 | 0.22<br>(24/159/289)                      | 0.16<br>(27/315/804)  | 1.02x10 <sup>-04</sup> | 1.14x10 <sup>-04</sup> | 1.46<br>(1.2-1.76)                     | 0.17<br>(16/167/386)                      | 0.17<br>(73/476/1238)                  | —                                         | —                                      | 0.20<br>(47/409/823)                      | 0.19<br>(55/380/886)                                   | 0.74                   | +-                                                       | 0.046                  | +++  |      |     |
| 21               | 23,619,231  | rs1459403                              | gene desert               | C<br>G                                 | 0.05<br>(1/42/429)                        | 0.02<br>(2/45/1099)   | 1.03x10 <sup>-04</sup> | —                      | 2.23<br>(1.47-3.37)                    | 0.05<br>(14/27/533)                       | 0.04<br>(2/131/1666)                   | —                                         | —                                      | 0.03<br>(0/49/682)                        | 0.03<br>(2/57/923)                                     | 0.09                   | ++?                                                      | 4.72x10 <sup>-04</sup> | +++? |      |     |
| 8                | 72,348,139  | rs11785185                             | EYA1<br>(within gene)     | A<br>T                                 | 0.19<br>(13/155/304)                      | 0.14<br>(32/250/864)  | 1.04x10 <sup>-04</sup> | 1.04x10 <sup>-04</sup> | 1.49<br>(1.22-1.82)                    | 0.17<br>(15/158/396)                      | 0.15<br>(49/432/1308)                  | —                                         | —                                      | 0.16<br>(28/317/934)                      | 0.13<br>(34/358/929)                                   | 0.66                   | ---                                                      | 0.19                   | ---  |      |     |
| 1                | 6,165,922   | rs7542655                              | CHD5<br>(± 10 kb)         | G<br>C                                 | 0.05<br>(2/43/427)                        | 0.02<br>(1/52/1093)   | 1.06x10 <sup>-04</sup> | —                      | 2.16<br>(1.45-3.22)                    | 0.03<br>(0/41/529)                        | 0.03<br>(0/125/1685)                   | —                                         | —                                      | —                                         | —                                                      | 0.65                   | -??                                                      | 0.038                  | +??  |      |     |
| 1                | 112,488,507 | rs1442840                              | gene desert               | G<br>C                                 | 0.41<br>(79/229/164)                      | 0.34<br>(114/548/484) | 1.08x10 <sup>-04</sup> | 9.98x10 <sup>-05</sup> | 1.36<br>(1.16-1.59)                    | 0.38<br>(85/262/225)                      | 0.37<br>(228/873/695)                  | —                                         | —                                      | 0.37<br>(-/-)                             | 0.39<br>(-/-)                                          | 0.68                   | ++                                                       | 0.04                   | +++  |      |     |
| 10               | 30,824,637  | rs7081639                              | MAP3K8<br>(± 50 kb)       | C<br>T                                 | 0.30<br>(38/209/225)                      | 0.37<br>(170/515/461) | 1.10x10 <sup>-04</sup> | 1.18x10 <sup>-04</sup> | 0.73<br>(0.62-0.85)                    | 0.36<br>(82/259/229)                      | 0.37<br>(264/784/738)                  | —                                         | —                                      | 0.36<br>(165/597/516)                     | 0.36<br>(159/632/531)                                  | 0.49                   | +-                                                       | 0.02                   | ---  |      |     |
| 7                | 69,955,663  | rs7784844                              | gene desert               | C<br>T                                 | 0.37<br>(56/234/182)                      | 0.30<br>(95/492/559)  | 1.10x10 <sup>-04</sup> | 1.20x10 <sup>-04</sup> | 1.37<br>(1.17-1.61)                    | 0.28<br>(51/226/294)                      | 0.31<br>(176/771/848)                  | —                                         | —                                      | 0.31<br>(-/-)                             | 0.31<br>(-/-)                                          | 0.05                   | +-                                                       | 0.94                   | +++  |      |     |



| Chr Pos. (bp)     | dbSNP ID   | Nearby genes (relative position) | A1 A2  | Panel A – GWAS                   |                                     |                        |                        | Panel B             |                                  | Panel C                             |                                  | Panel D                             |                                  | Panel B - D (replication only)      |                    | Panel A - D (GWAS & replication) |                        |           |
|-------------------|------------|----------------------------------|--------|----------------------------------|-------------------------------------|------------------------|------------------------|---------------------|----------------------------------|-------------------------------------|----------------------------------|-------------------------------------|----------------------------------|-------------------------------------|--------------------|----------------------------------|------------------------|-----------|
|                   |            |                                  |        | AF <sub>A1</sub> (11/12/22) Case | AF <sub>A1</sub> (11/12/22) Control | P <sub>CCA</sub>       | LRP                    | OR (95% CI)         | AF <sub>A1</sub> (11/12/22) Case | AF <sub>A1</sub> (11/12/22) Control | AF <sub>A1</sub> (11/12/22) Case | AF <sub>A1</sub> (11/12/22) Control | AF <sub>A1</sub> (11/12/22) Case | AF <sub>A1</sub> (11/12/22) Control | P <sub>repl.</sub> | Direction                        | P <sub>comb.</sub>     | Direction |
| 3<br>74,622,313   | rs7610815  | <i>CNTN3</i><br>(within gene)    | T<br>G | 0.06<br>(0/54/418)               | 0.03<br>(0/66/1080)                 | 1.12×10 <sup>-04</sup> | —                      | 2.04<br>(1.41-2.94) | 0.04<br>(1/47/526)               | 0.03<br>(3/105/1683)                | —                                | —                                   | 0.03<br>(0/45/689)               | 0.03<br>(2/51/930)                  | 0.09               | +?+                              | 5.43×10 <sup>-04</sup> | ++?+      |
| 17<br>50,719,025  | rs16955840 | <i>HLF</i><br>(within gene)      | C<br>T | 0.04<br>(1/40/431)               | 0.02<br>(1/44/1101)                 | 1.13×10 <sup>-04</sup> | 6.14×10 <sup>-04</sup> | 2.26<br>(1.48-3.46) | 0.04<br>(1/50/524)               | 0.04<br>(3/143/1657)                | 0.03<br>(-/-)                    | 0.03<br>(-/-)                       | 0.03<br>(-/-)                    | 0.03<br>(-/-)                       | 0.72               | +++                              | 0.18                   | +++       |
| 14<br>43,316,238  | rs11157365 | gene desert                      | C<br>A | 0.12<br>(6/101/365)              | 0.08<br>(5/166/975)                 | 1.17×10 <sup>-04</sup> | 1.39×10 <sup>-04</sup> | 1.63<br>(1.27-2.09) | 0.09<br>(4/92/472)               | 0.09<br>(10/312/1466)               | 0.10<br>(-/-)                    | 0.10<br>(-/-)                       | 0.10<br>(6/136/617)              | 0.11<br>(9/206/776)                 | 0.22               | ---                              | 0.56                   | +++       |
| 8<br>117,611,566  | rs4268153  | gene desert                      | A<br>G | 0.12<br>(10/97/365)              | 0.08<br>(13/158/975)                | 1.19×10 <sup>-04</sup> | 1.93×10 <sup>-04</sup> | 1.61<br>(1.26-2.06) | 0.07<br>(2/69/501)               | 0.09<br>(19/301/1485)               | 0.08<br>(5/189/1083)             | 0.08<br>(7/194/1120)                | 0.09<br>(-/-)                    | 0.08<br>(-/-)                       | 0.13               | ++                               | 0.76                   | +++       |
| 2<br>19,643,786   | rs11096601 | gene desert                      | T<br>C | 0.47<br>(110/228/134)            | 0.40<br>(196/528/422)               | 1.22×10 <sup>-04</sup> | 2.01×10 <sup>-04</sup> | 1.35<br>(1.16-1.57) | 0.41<br>(100/270/201)            | 0.42<br>(323/895/599)               | 0.43<br>(244/615/420)            | 0.43<br>(253/622/445)               | 0.45<br>(142/396/224)            | 0.46<br>(196/519/279)               | 0.44               | ++                               | 0.32                   | +++       |
| 10<br>748,971     | rs11253337 | <i>DIP2C</i><br>(± 50 kb)        | T<br>G | 0.26<br>(31/184/257)             | 0.20<br>(49/359/738)                | 1.23×10 <sup>-04</sup> | 1.63×10 <sup>-04</sup> | 1.42<br>(1.19-1.69) | 0.22<br>(36/178/354)             | 0.21<br>(88/560/1133)               | 0.24<br>(-/-)                    | 0.23<br>(-/-)                       | 0.23<br>(43/259/459)             | 0.22<br>(46/348/600)                | 0.14               | +++                              | 2.71×10 <sup>-03</sup> | ++++      |
| 2<br>150,052,578  | rs17348610 | <i>LYPD6</i><br>(± 20 kb)        | G<br>A | 0.17<br>(9/145/318)              | 0.12<br>(16/246/884)                | 1.31×10 <sup>-04</sup> | 1.13×10 <sup>-04</sup> | 1.50<br>(1.22-1.86) | 0.13<br>(11/124/438)             | 0.12<br>(25/396/1401)               | 0.13<br>(24/281/971)             | 0.13<br>(19/293/1008)               | 0.11<br>(15/141/606)             | 0.12<br>(15/212/767)                | 0.87               | ++                               | 0.07                   | +++       |
| 7<br>101,423,966  | rs202159   | <i>CUX1</i><br>(within gene)     | T<br>C | 0.35<br>(64/202/206)             | 0.28<br>(77/491/578)                | 1.32×10 <sup>-04</sup> | 1.06×10 <sup>-04</sup> | 1.37<br>(1.17-1.61) | 0.31<br>(53/249/263)             | 0.29<br>(142/782/890)               | 0.30<br>(-/-)                    | 0.30<br>(-/-)                       | 0.31<br>(64/345/348)             | 0.29<br>(78/426/488)                | 0.18               | ++                               | 4.18×10 <sup>-03</sup> | +++       |
| 11<br>12,032,405  | rs7928952  | (± 50 kb)                        | A<br>C | 0.24<br>(28/170/274)             | 0.18<br>(39/334/773)                | 1.34×10 <sup>-04</sup> | —                      | 1.43<br>(1.19-1.72) | 0.21<br>(25/177/372)             | 0.21<br>(91/575/1120)               | —                                | —                                   | 0.19<br>(42/247/471)             | 0.18<br>(42/331/620)                | 0.65               | -?+                              | 0.017                  | +?+       |
| 12<br>5,395,521   | rs10849262 | <i>NTF3</i><br>(± 20 kb)         | A<br>G | 0.31<br>(46/202/224)             | 0.38<br>(159/555/432)               | 1.35×10 <sup>-04</sup> | 1.47×10 <sup>-04</sup> | 0.73<br>(0.62-0.86) | 0.36<br>(83/248/238)             | 0.36<br>(238/801/757)               | 0.35<br>(163/571/545)            | 0.34<br>(152/599/569)               | 0.34<br>(88/346/328)             | 0.36<br>(138/438/418)               | 0.88               | ++                               | 0.13                   | +++       |
| 12<br>15,220,937  | rs12425381 | <i>REG1</i><br>(within gene)     | G<br>C | 0.27<br>(40/172/260)             | 0.21<br>(43/385/718)                | 1.36×10 <sup>-04</sup> | 5.80×10 <sup>-04</sup> | 1.41<br>(1.18-1.68) | 0.24<br>(38/181/354)             | 0.23<br>(96/646/1053)               | 0.20<br>(58/398/822)             | 0.22<br>(79/435/808)                | 0.22<br>(-/-)                    | 0.21<br>(-/-)                       | 0.56               | ++                               | 0.25                   | +++       |
| 9<br>104,585,304  | rs994864   | gene desert                      | T<br>C | 0.22<br>(26/161/285)             | 0.29<br>(96/473/577)                | 1.37×10 <sup>-04</sup> | 4.79×10 <sup>-04</sup> | 0.71<br>(0.59-0.85) | 0.30<br>(62/217/292)             | 0.29<br>(152/715/919)               | 0.28<br>(87/512/630)             | 0.26<br>(87/447/726)                | 0.26<br>(-/-)                    | 0.28<br>(-/-)                       | 0.14               | ++                               | 0.73                   | +++       |
| 10<br>99,624,633  | rs4919154  | <i>CRTAC1</i><br>(within gene)   | C<br>T | 0.42<br>(82/229/161)             | 0.49<br>(274/573/299)               | 1.37×10 <sup>-04</sup> | 1.89×10 <sup>-04</sup> | 0.74<br>(0.64-0.87) | 0.46<br>(120/285/163)            | 0.48<br>(400/912/490)               | 0.46<br>(280/620/378)            | 0.47<br>(279/697/345)               | 0.50<br>(176/405/181)            | 0.50<br>(244/510/239)               | 0.22               | ---                              | 5.51×10 <sup>-03</sup> | ---       |
| 21<br>41,671,059  | rs379839   | <i>MX2</i><br>(within gene)      | A<br>G | 0.53<br>(137/222/113)            | 0.45<br>(229/580/337)               | 1.38×10 <sup>-04</sup> | 1.98×10 <sup>-04</sup> | 1.34<br>(1.15-1.56) | 0.47<br>(111/304/153)            | 0.48<br>(426/886/501)               | —                                | —                                   | 0.44<br>(148/361/253)            | 0.45<br>(221/449/324)               | 0.24               | -?                               | 0.32                   | +?+       |
| 6<br>110,593,105  | rs12191724 | <i>WASF1</i><br>(within gene)    | A<br>G | 0.07<br>(5/59/408)               | 0.12<br>(19/232/895)                | 1.40×10 <sup>-04</sup> | 1.35×10 <sup>-04</sup> | 0.59<br>(0.45-0.77) | 0.11<br>(3/117/455)              | 0.10<br>(22/325/1477)               | —                                | —                                   | 0.11<br>(14/184/564)             | 0.09<br>(20/183/791)                | 0.04               | +?+                              | 0.77                   | +?+       |
| 6<br>1,394,120    | rs2745636  | gene desert                      | G<br>T | 0.40<br>(80/215/177)             | 0.47<br>(251/582/313)               | 1.41×10 <sup>-04</sup> | 8.03×10 <sup>-06</sup> | 0.74<br>(0.64-0.87) | 0.46<br>(116/278/176)            | 0.45<br>(378/889/546)               | 0.45<br>(273/602/395)            | 0.45<br>(262/652/402)               | 0.50<br>(182/394/186)            | 0.47<br>(214/510/269)               | 0.34               | +++                              | 0.42                   | +++       |
| 12<br>57,286,450  | rs10877152 | gene desert                      | G<br>C | 0.24<br>(36/157/279)             | 0.31<br>(110/494/542)               | 1.42×10 <sup>-04</sup> | 1.31×10 <sup>-04</sup> | 0.72<br>(0.6-0.85)  | 0.27<br>(32/230/310)             | 0.29<br>(139/754/903)               | 0.27<br>(100/473/675)            | 0.27<br>(87/530/687)                | 0.31<br>(-/-)                    | 0.32<br>(-/-)                       | 0.24               | ++                               | 6.67×10 <sup>-03</sup> | +++       |
| 2<br>206,519,890  | rs12478185 | <i>FLJ20309</i><br>(± 50 kb)     | T<br>C | 0.06<br>(0/53/419)               | 0.10<br>(14/197/935)                | 1.43×10 <sup>-04</sup> | 4.98×10 <sup>-06</sup> | 0.55<br>(0.41-0.75) | 0.09<br>(8/86/480)               | 0.08<br>(6/270/1543)                | 0.08<br>(-/-)                    | 0.08<br>(-/-)                       | 0.09<br>(7/129/625)              | 0.09<br>(5/165/824)                 | 0.38               | ++                               | 0.38                   | +++       |
| 2<br>139,925,381  | rs2163585  | gene desert                      | C<br>T | 0.40<br>(70/232/170)             | 0.47<br>(260/554/332)               | 1.43×10 <sup>-04</sup> | 1.31×10 <sup>-04</sup> | 0.74<br>(0.64-0.87) | 0.44<br>(122/262/178)            | 0.44<br>(364/859/573)               | 0.47<br>(-/-)                    | 0.46<br>(-/-)                       | 0.48<br>(-/-)                    | 0.48<br>(-/-)                       | 0.50               | ++                               | 0.29                   | +++       |
| 7<br>71,123,181   | rs844788   | <i>CALN1</i><br>(within gene)    | C<br>T | 0.12<br>(5/106/361)              | 0.18<br>(31/342/773)                | 1.43×10 <sup>-04</sup> | 2.18×10 <sup>-04</sup> | 0.65<br>(0.52-0.81) | 0.17<br>(18/167/390)             | 0.18<br>(62/519/1223)               | 0.16<br>(35/327/916)             | 0.16<br>(36/360/925)                | 0.18<br>(-/-)                    | 0.18<br>(-/-)                       | 0.81               | ++                               | 0.06                   | +++       |
| 7<br>92,759,408   | rs7790676  | <i>CCDC132</i><br>(within gene)  | G<br>A | 0.06<br>(2/56/414)               | 0.11<br>(21/201/924)                | 1.44×10 <sup>-04</sup> | —                      | 0.57<br>(0.42-0.76) | 0.12<br>(10/126/437)             | 0.12<br>(35/367/1397)               | 0.11<br>(-/-)                    | 0.11<br>(-/-)                       | 0.11<br>(-/-)                    | 0.12<br>(-/-)                       | 0.79               | ++                               | 0.06                   | +++       |
| 1<br>44,771,051   | rs10890308 | <i>RNF220</i><br>(within gene)   | C<br>T | 0.45<br>(101/227/144)            | 0.38<br>(182/514/450)               | 1.59×10 <sup>-04</sup> | 2.50×10 <sup>-04</sup> | 1.34<br>(1.15-1.57) | 0.38<br>(80/276/218)             | 0.40<br>(299/846/664)               | 0.40<br>(194/625/457)            | 0.39<br>(197/622/498)               | 0.36<br>(117/319/326)            | 0.39<br>(145/486/363)               | 0.37               | ++                               | 0.40                   | +++       |
| 12<br>111,192,923 | rs11610922 | <i>C12orf51</i><br>(within gene) | A<br>G | 0.09<br>(4/72/396)               | 0.05<br>(5/106/1035)                | 1.60×10 <sup>-04</sup> | 8.27×10 <sup>-04</sup> | 1.75<br>(1.31-2.35) | 0.06<br>(1/66/507)               | 0.06<br>(4/209/1575)                | —                                | —                                   | 0.10<br>(-/-)                    | 0.08<br>(-/-)                       | 0.22               | +?+                              | 2.51×10 <sup>-03</sup> | +++       |
| 10<br>125,925,994 | rs7904325  | gene desert                      | A<br>G | 0.14<br>(6/123/343)              | 0.20<br>(50/358/738)                | 1.62×10 <sup>-04</sup> | 8.73×10 <sup>-05</sup> | 0.67<br>(0.54-0.83) | 0.19<br>(24/168/380)             | 0.17<br>(58/501/1247)               | 0.18<br>(32/385/823)             | 0.18<br>(44/381/866)                | 0.17<br>(21/210/531)             | 0.18<br>(28/299/667)                | 0.83               | +++                              | 0.15                   | +++       |
| 6<br>475,476      | rs6938671  | <i>EXOC2</i><br>(within gene)    | G<br>T | 0.36<br>(63/210/199)             | 0.29<br>(95/473/578)                | 1.63×10 <sup>-04</sup> | 2.26×10 <sup>-04</sup> | 1.36<br>(1.16-1.6)  | 0.31<br>(60/252/256)             | 0.30<br>(155/764/887)               | 0.28<br>(-/-)                    | 0.27<br>(-/-)                       | 0.27<br>(49/312/401)             | 0.26<br>(61/404/529)                | 0.20               | +++                              | 5.07×10 <sup>-03</sup> | ++++      |
| 6<br>103,217,861  | rs6571042  | gene desert                      | T<br>C | 0.11<br>(8/91/373)               | 0.07<br>(8/150/988)                 | 1.63×10 <sup>-04</sup> | 2.77×10 <sup>-04</sup> | 1.63<br>(1.26-2.1)  | 0.09<br>(5/90/479)               | 0.08<br>(14/253/1507)               | 0.09<br>(-/-)                    | 0.09<br>(-/-)                       | 0.08<br>(-/-)                    | 0.07<br>(-/-)                       | 0.34               | ++                               | 0.01                   | +++       |

| Chr<br>Pos. (bp) | dbSNP ID   | Nearby genes<br>(relative<br>position) | A1<br>A2 | Panel A – GWAS<br>Germany<br>472 cases<br>1146 controls |                                           |                        |                        |                     | Panel B<br>Germany<br>681 cases<br>1824 controls |                                           | Panel C<br>CASP<br>1303 cases<br>1322 controls |                                           | Panel D<br>Genizon<br>762 cases<br>994 controls |                                           | Panel B - D<br>(replication only)<br>Combined analysis<br>2746 cases<br>4140 controls |           | Panel A - D<br>(GWAS & replication)<br>Combined analysis<br>3218 cases<br>5286 controls |           |
|------------------|------------|----------------------------------------|----------|---------------------------------------------------------|-------------------------------------------|------------------------|------------------------|---------------------|--------------------------------------------------|-------------------------------------------|------------------------------------------------|-------------------------------------------|-------------------------------------------------|-------------------------------------------|---------------------------------------------------------------------------------------|-----------|-----------------------------------------------------------------------------------------|-----------|
|                  |            |                                        |          | AF <sub>A1</sub><br>(11/12/22)<br>Case                  | AF <sub>A1</sub><br>(11/12/22)<br>Control | P <sub>CCA</sub>       | LRP                    | OR<br>(95% CI)      | AF <sub>A1</sub><br>(11/12/22)<br>Case           | AF <sub>A1</sub><br>(11/12/22)<br>Control | AF <sub>A1</sub><br>(11/12/22)<br>Case         | AF <sub>A1</sub><br>(11/12/22)<br>Control | AF <sub>A1</sub><br>(11/12/22)<br>Case          | AF <sub>A1</sub><br>(11/12/22)<br>Control | P <sub>repl.</sub>                                                                    | Direction | P <sub>comb.</sub>                                                                      | Direction |
| 8<br>139,010,233 | rs2326142  | gene desert                            | T<br>G   | 0.44<br>(91/234/147)                                    | 0.51<br>(293/589/264)                     | 1.63×10 <sup>-04</sup> | 2.99×10 <sup>-04</sup> | 0.75<br>(0.64-0.87) | 0.48<br>(141/267/166)                            | 0.46<br>(390/883/516)                     | 0.48<br>(-/-)                                  | 0.47<br>(-/-)                             | 0.50<br>(-/-)                                   | 0.49<br>(-/-)                             | 0.30                                                                                  | +++       | 0.48                                                                                    | +++       |
| 9<br>82,740,226  | rs7042779  | gene desert                            | C<br>G   | 0.05<br>(1/46/425)                                      | 0.02<br>(1/55/1090)                       | 1.65×10 <sup>-04</sup> | 3.51×10 <sup>-04</sup> | 2.09<br>(1.41-3.09) | 0.02<br>(2/21/546)                               | 0.02<br>(2/62/1736)                       | 0.03<br>(-/-)                                  | 0.03<br>(-/-)                             | 0.03<br>(-/-)                                   | 0.03<br>(-/-)                             | 0.30                                                                                  | ++        | 0.01                                                                                    | +++       |
| 8<br>111,387,472 | rs16880591 | gene desert                            | G<br>A   | 0.04<br>(0/36/436)                                      | 0.07<br>(5/158/983)                       | 1.66×10 <sup>-04</sup> | 8.29×10 <sup>-05</sup> | 0.50<br>(0.35-0.72) | 0.07<br>(0/83/492)                               | 0.07<br>(6/225/1562)                      | 0.07<br>(-/-)                                  | 0.07<br>(-/-)                             | 0.06<br>(-/-)                                   | 0.06<br>(-/-)                             | 0.32                                                                                  | +++       | 0.45                                                                                    | +++       |
| 16<br>52,679,248 | rs697769   | <i>FTO</i><br>(within gene)            | A<br>G   | 0.40<br>(75/229/168)                                    | 0.47<br>(264/559/323)                     | 1.67×10 <sup>-04</sup> | 2.05×10 <sup>-04</sup> | 0.74<br>(0.64-0.87) | 0.44<br>(109/272/188)                            | 0.45<br>(366/872/549)                     | 0.44<br>(-/-)                                  | 0.44<br>(-/-)                             | 0.44<br>(-/-)                                   | 0.43<br>(-/-)                             | 0.64                                                                                  | ++        | 0.04                                                                                    | ---       |
| 9<br>137,155,534 | rs647128   | <i>OLFM1</i><br>(± 10 kb)              | A<br>G   | 0.40<br>(72/231/169)                                    | 0.47<br>(251/575/320)                     | 1.70×10 <sup>-04</sup> | 1.29×10 <sup>-04</sup> | 0.74<br>(0.64-0.87) | 0.47<br>(136/257/167)                            | 0.44<br>(378/853/578)                     | 0.47<br>(-/-)                                  | 0.46<br>(-/-)                             | 0.44<br>(153/359/250)                           | 0.43<br>(177/510/307)                     | 0.16                                                                                  | +++       | 0.71                                                                                    | +++       |
| 6<br>96,685,540  | rs7742857  | <i>FUT9</i><br>(within gene)           | G<br>T   | 0.29<br>(43/185/244)                                    | 0.35<br>(142/528/476)                     | 1.73×10 <sup>-04</sup> | 2.36×10 <sup>-04</sup> | 0.73<br>(0.62-0.86) | 0.36<br>(76/256/243)                             | 0.35<br>(212/836/773)                     | 0.35<br>(145/585/539)                          | 0.35<br>(144/619/551)                     | 0.33<br>(77/347/338)                            | 0.34<br>(113/456/425)                     | 0.98                                                                                  | ++        | 0.11                                                                                    | ---       |
| 4<br>178,728,437 | rs4690536  | gene desert                            | A<br>G   | 0.28<br>(42/184/246)                                    | 0.35<br>(132/540/474)                     | 1.79×10 <sup>-04</sup> | 1.91×10 <sup>-04</sup> | 0.73<br>(0.62-0.86) | 0.34<br>(67/257/252)                             | 0.33<br>(193/820/797)                     | 0.33<br>(-/-)                                  | 0.34<br>(-/-)                             | 0.33<br>(69/360/332)                            | 0.32<br>(102/433/458)                     | 0.95                                                                                  | ++        | 0.09                                                                                    | ---       |
| 19<br>59,186,575 | rs251850   | <i>CACNG6</i><br>(± 10 kb)             | C<br>T   | 0.27<br>(41/172/259)                                    | 0.21<br>(50/380/716)                      | 1.79×10 <sup>-04</sup> | —                      | 1.40<br>(1.17-1.66) | 0.25<br>(49/234/379)                             | 0.23<br>(101/627/1061)                    | —                                              | —                                         | 0.22<br>(37/254/441)                            | 0.20<br>(31/328/622)                      | 0.026                                                                                 | ++?       | 1.14×10 <sup>-04</sup>                                                                  | +++?      |
| 14<br>98,598,490 | rs8004111  | gene desert                            | A<br>G   | 0.28<br>(35/191/246)                                    | 0.34<br>(127/532/487)                     | 1.81×10 <sup>-04</sup> | 1.50×10 <sup>-04</sup> | 0.73<br>(0.62-0.86) | 0.33<br>(68/235/262)                             | 0.30<br>(164/761/873)                     | 0.30<br>(-/-)                                  | 0.30<br>(-/-)                             | 0.34<br>(-/-)                                   | 0.34<br>(-/-)                             | 0.15                                                                                  | +++       | 0.74                                                                                    | +++       |
| 3<br>793,135     | rs17047823 | gene desert                            | C<br>A   | 0.15<br>(11/122/339)                                    | 0.11<br>(13/215/918)                      | 1.83×10 <sup>-04</sup> | 2.52×10 <sup>-04</sup> | 1.52<br>(1.22-1.9)  | 0.12<br>(15/120/441)                             | 0.12<br>(24/376/1391)                     | 0.14<br>(-/-)                                  | 0.14<br>(-/-)                             | 0.10<br>(-/-)                                   | 0.13<br>(-/-)                             | 0.16                                                                                  | ---       | 0.72                                                                                    | ---       |
| 7<br>126,637,457 | rs17864159 | <i>GRM8</i><br>(within gene)           | T<br>C   | 0.09<br>(3/81/388)                                      | 0.06<br>(7/114/1025)                      | 1.86×10 <sup>-04</sup> | 3.04×10 <sup>-04</sup> | 1.71<br>(1.29-2.27) | 0.06<br>(2/69/498)                               | 0.07<br>(6/223/1576)                      | —                                              | —                                         | 0.05<br>(2/67/693)                              | 0.05<br>(1/103/890)                       | 0.57                                                                                  | -?        | 0.14                                                                                    | +?-       |
| 14<br>86,629,923 | rs12586410 | gene desert                            | T<br>G   | 0.45<br>(98/230/144)                                    | 0.38<br>(174/520/452)                     | 1.87×10 <sup>-04</sup> | 1.76×10 <sup>-04</sup> | 1.34<br>(1.15-1.56) | 0.41<br>(86/296/191)                             | 0.40<br>(285/880/646)                     | 0.58<br>(-/-)                                  | 0.58<br>(-/-)                             | 0.41<br>(139/352/271)                           | 0.39<br>(145/486/363)                     | 0.63                                                                                  | ++        | 0.039                                                                                   | +++       |
| 19<br>63,328,964 | rs6510125  | <i>ZNF329</i><br>(± 10 kb)             | T<br>C   | 0.28<br>(36/195/241)                                    | 0.22<br>(68/371/707)                      | 1.89×10 <sup>-04</sup> | 2.88×10 <sup>-04</sup> | 1.39<br>(1.17-1.65) | 0.24<br>(37/203/332)                             | 0.23<br>(89/647/1081)                     | 0.24<br>(68/470/741)                           | 0.26<br>(80/517/725)                      | 0.24<br>(41/281/440)                            | 0.23<br>(51/358/585)                      | 0.80                                                                                  | ++        | 0.16                                                                                    | +++       |
| 9<br>135,657,976 | rs10123623 | <i>VAV2</i><br>(within gene)           | A<br>G   | 0.08<br>(3/66/403)                                      | 0.04<br>(0/100/1046)                      | 1.89×10 <sup>-04</sup> | 1.95×10 <sup>-04</sup> | 1.80<br>(1.32-2.46) | 0.06<br>(0/68/503)                               | 0.07<br>(7/222/1566)                      | —                                              | —                                         | 0.06<br>(-/-)                                   | 0.05<br>(-/-)                             | 0.98                                                                                  | -?+       | 0.05                                                                                    | +?+       |
| 13<br>24,616,283 | rs7325885  | <i>FAM123A</i><br>(± 50 kb)            | G<br>T   | 0.52<br>(132/228/112)                                   | 0.45<br>(251/530/365)                     | 1.92×10 <sup>-04</sup> | 3.61×10 <sup>-04</sup> | 1.33<br>(1.15-1.55) | 0.48<br>(127/291/154)                            | 0.47<br>(401/906/497)                     | 0.45<br>(261/648/370)                          | 0.45<br>(254/693/373)                     | 0.42<br>(121/390/250)                           | 0.45<br>(214/465/315)                     | 0.35                                                                                  | ---       | 0.43                                                                                    | +++       |
| 5<br>174,125,915 | rs1507805  | <i>MSX2</i><br>(± 50 kb)               | C<br>T   | 0.25<br>(28/179/265)                                    | 0.19<br>(37/365/744)                      | 1.95×10 <sup>-04</sup> | 3.47×10 <sup>-04</sup> | 1.41<br>(1.18-1.69) | 0.20<br>(26/173/372)                             | 0.20<br>(77/552/1158)                     | 0.23<br>(72/439/740)                           | 0.22<br>(68/437/801)                      | 0.23<br>(-/-)                                   | 0.20<br>(-/-)                             | 0.08                                                                                  | +++       | 1.30×10 <sup>-03</sup>                                                                  | ++++      |
| 18<br>28,336,657 | rs12455882 | <i>FAM59A</i><br>(± 50 kb)             | A<br>G   | 0.12<br>(10/96/366)                                     | 0.18<br>(30/344/772)                      | 1.95×10 <sup>-04</sup> | 7.61×10 <sup>-05</sup> | 0.66<br>(0.53-0.82) | 0.15<br>(10/148/413)                             | 0.15<br>(40/469/1287)                     | —                                              | —                                         | 0.22<br>(-/-)                                   | 0.20<br>(-/-)                             | 0.48                                                                                  | -?+       | 0.18                                                                                    | --?+      |
| 6<br>143,329,978 | rs1041656  | <i>HIVEP2</i><br>(± 50 kb)             | A<br>G   | 0.50<br>(120/234/118)                                   | 0.43<br>(209/564/373)                     | 1.95×10 <sup>-04</sup> | 1.62×10 <sup>-04</sup> | 1.33<br>(1.15-1.55) | 0.45<br>(108/285/177)                            | 0.45<br>(361/895/546)                     | 0.42<br>(-/-)                                  | 0.42<br>(-/-)                             | 0.41<br>(-/-)                                   | 0.43<br>(-/-)                             | 0.54                                                                                  | ---       | 0.28                                                                                    | ---       |
| 9<br>9,020,517   | rs375118   | <i>PTPRD</i><br>(within gene)          | G<br>C   | 0.10<br>(10/77/385)                                     | 0.15<br>(25/298/823)                      | 1.95×10 <sup>-04</sup> | 6.15×10 <sup>-05</sup> | 0.64<br>(0.5-0.81)  | 0.09<br>(4/95/476)                               | 0.11<br>(18/359/1420)                     | 0.10<br>(8/249/1018)                           | 0.10<br>(11/244/1061)                     | 0.10<br>(9/145/572)                             | 0.10<br>(11/192/774)                      | 0.38                                                                                  | ++        | 0.016                                                                                   | +++       |
| 9<br>127,898,418 | rs11787836 | gene desert                            | T<br>C   | 0.19<br>(14/145/313)                                    | 0.13<br>(20/268/858)                      | 1.95×10 <sup>-04</sup> | 1.83×10 <sup>-04</sup> | 1.47<br>(1.2-1.8)   | 0.18<br>(21/165/387)                             | 0.20<br>(72/585/1149)                     | 0.20<br>(49/407/821)                           | 0.21<br>(70/419/830)                      | 0.16<br>(-/-)                                   | 0.16<br>(-/-)                             | 0.06                                                                                  | ---       | 0.93                                                                                    | ---       |
| 18<br>8,574,076  | rs12051975 | <i>RAB12</i><br>(± 50 kb)              | G<br>T   | 0.03<br>(0/32/440)                                      | 0.07<br>(3/148/995)                       | 1.98×10 <sup>-04</sup> | —                      | 0.49<br>(0.33-0.72) | 0.08<br>(1/82/489)                               | 0.05<br>(5/187/1609)                      | 0.05<br>(-/-)                                  | 0.05<br>(-/-)                             | 0.07<br>(1/94/638)                              | 0.06<br>(6/98/879)                        | 1.07×10 <sup>-03</sup>                                                                | +++       | 1.90E-01                                                                                | +++       |
| 12<br>40,527,536 | rs11181191 | gene desert                            | G<br>C   | 0.23<br>(28/161/283)                                    | 0.17<br>(41/314/791)                      | 2.06×10 <sup>-04</sup> | 2.86×10 <sup>-04</sup> | 1.42<br>(1.18-1.71) | 0.21<br>(26/206/342)                             | 0.19<br>(63/567/1160)                     | 0.21<br>(63/408/800)                           | 0.20<br>(62/410/844)                      | 0.19<br>(-/-)                                   | 0.19<br>(-/-)                             | 0.29                                                                                  | ++        | 0.01                                                                                    | +++       |
| 16<br>24,229,868 | rs7187560  | <i>CACNG3</i><br>(within gene)         | T<br>C   | 0.39<br>(76/215/181)                                    | 0.46<br>(241/573/332)                     | 2.09×10 <sup>-04</sup> | 2.45×10 <sup>-04</sup> | 0.75<br>(0.64-0.87) | 0.45<br>(106/293/169)                            | 0.42<br>(327/860/617)                     | 0.45<br>(-/-)                                  | 0.44<br>(-/-)                             | 0.56<br>(-/-)                                   | 0.56<br>(-/-)                             | 0.04                                                                                  | +++       | 0.83                                                                                    | +++       |
| 13<br>60,972,767 | rs17258304 | gene desert                            | C<br>T   | 0.10<br>(8/82/382)                                      | 0.15<br>(23/307/816)                      | 2.11×10 <sup>-04</sup> | 2.49×10 <sup>-04</sup> | 0.64<br>(0.51-0.81) | 0.14<br>(11/151/415)                             | 0.16<br>(55/456/1294)                     | 0.14<br>(21/320/930)                           | 0.14<br>(27/322/969)                      | 0.17<br>(-/-)                                   | 0.15<br>(-/-)                             | 0.79                                                                                  | ---       | 0.06                                                                                    | ---       |
| 6<br>2,966,865   | rs10223660 | <i>NQO2</i><br>(± 10 kb)               | T<br>C   | 0.51<br>(114/255/103)                                   | 0.44<br>(205/597/344)                     | 2.16×10 <sup>-04</sup> | —                      | 1.33<br>(1.14-1.55) | 0.39<br>(80/275/200)                             | 0.40<br>(245/842/591)                     | —                                              | —                                         | —                                               | —                                         | 0.57                                                                                  | -??       | 0.06                                                                                    | +??       |
| 7<br>71,077,743  | rs12530737 | <i>CALN1</i><br>(within gene)          | C<br>T   | 0.22<br>(24/163/285)                                    | 0.29<br>(98/459/589)                      | 2.17×10 <sup>-04</sup> | 2.66×10 <sup>-04</sup> | 0.72<br>(0.6-0.85)  | 0.28<br>(50/225/294)                             | 0.28<br>(150/695/945)                     | 0.25<br>(-/-)                                  | 0.26<br>(-/-)                             | 0.30<br>(69/316/377)                            | 0.29<br>(88/406/499)                      | 0.62                                                                                  | ---       | 0.04                                                                                    | ---       |

| Chr Pos. (bp)     | dbSNP ID   | Nearby genes (relative position) | A1 A2  | Panel A – GWAS<br>Germany<br>472 cases<br>1146 controls |                                           |                        |                        | Panel B<br>Germany<br>681 cases<br>1824 controls |                                        | Panel C<br>CASP<br>1303 cases<br>1322 controls |                                        | Panel D<br>Genizon<br>762 cases<br>994 controls |                                        | Panel B - D<br>(replication only)<br>Combined analysis<br>2746 cases<br>4140 controls |                        | Panel A - D<br>(GWAS & replication)<br>Combined analysis<br>3218 cases<br>5286 controls |                        |           |
|-------------------|------------|----------------------------------|--------|---------------------------------------------------------|-------------------------------------------|------------------------|------------------------|--------------------------------------------------|----------------------------------------|------------------------------------------------|----------------------------------------|-------------------------------------------------|----------------------------------------|---------------------------------------------------------------------------------------|------------------------|-----------------------------------------------------------------------------------------|------------------------|-----------|
|                   |            |                                  |        | AF <sub>A1</sub><br>(11/12/22)<br>Case                  | AF <sub>A1</sub><br>(11/12/22)<br>Control | P <sub>CCA</sub>       | LRP                    | OR<br>(95% CI)                                   | AF <sub>A1</sub><br>(11/12/22)<br>Case | AF <sub>A1</sub><br>(11/12/22)<br>Control      | AF <sub>A1</sub><br>(11/12/22)<br>Case | AF <sub>A1</sub><br>(11/12/22)<br>Control       | AF <sub>A1</sub><br>(11/12/22)<br>Case | AF <sub>A1</sub><br>(11/12/22)<br>Control                                             | P <sub>repl.</sub>     | Direction                                                                               | P <sub>comb.</sub>     | Direction |
| 11<br>24,429,664  | rs10834343 | LUZP2<br>(± 50 kb)               | A<br>G | 0.43<br>(84/240/148)                                    | 0.50<br>(283/591/272)                     | 2.22×10 <sup>-04</sup> | 3.22×10 <sup>-04</sup> | 0.75<br>(0.64-0.87)                              | 0.50<br>(151/276/148)                  | 0.48<br>(426/868/488)                          | 0.49<br>(---)                          | 0.48<br>(---)                                   | 0.50<br>(---)                          | 0.52<br>(---)                                                                         | 0.60                   | ++                                                                                      | 0.26                   | +++       |
| 13<br>102,872,067 | rs9586186  | gene desert                      | T<br>C | 0.20<br>(19/154/299)                                    | 0.15<br>(32/279/835)                      | 2.26×10 <sup>-04</sup> | 2.88×10 <sup>-04</sup> | 1.44<br>(1.19-1.76)                              | 0.17<br>(17/151/405)                   | 0.16<br>(38/484/1265)                          | 0.16<br>(33/329/903)                   | 0.16<br>(42/334/941)                            | 0.15<br>(19/180/555)                   | 0.17<br>(28/279/687)                                                                  | 0.61                   | +++                                                                                     | 0.25                   | +++       |
| 7<br>27,208,185   | rs2067087  | HOXA13<br>(± 10 kb)              | C<br>C | 0.35<br>(50/226/196)                                    | 0.28<br>(95/458/593)                      | 2.26×10 <sup>-04</sup> | 8.31×10 <sup>-04</sup> | 1.36<br>(1.15-1.59)                              | 0.30<br>(45/248/266)                   | 0.28<br>(154/696/921)                          | 0.31<br>(116/567/582)                  | 0.31<br>(112/577/609)                           | 0.25<br>(---)                          | 0.27<br>(---)                                                                         | 0.78                   | ++                                                                                      | 0.06                   | +++       |
| 13<br>55,384,367  | rs9597294  | gene desert                      | C<br>A | 0.12<br>(5/99/368)                                      | 0.17<br>(38/310/798)                      | 2.26×10 <sup>-04</sup> | 1.43×10 <sup>-04</sup> | 0.65<br>(0.52-0.82)                              | 0.16<br>(20/140/416)                   | 0.16<br>(51/486/1247)                          | 0.15<br>(---)                          | 0.16<br>(---)                                   | 0.13<br>(---)                          | 0.14<br>(---)                                                                         | 0.17                   | ---                                                                                     | 4.39×10 <sup>-03</sup> | ----      |
| 10<br>69,536,179  | rs9919371  | MYPN<br>(± 10 kb)                | C<br>T | 0.11<br>(6/89/377)                                      | 0.07<br>(5/146/995)                       | 2.27×10 <sup>-04</sup> | 3.03×10 <sup>-04</sup> | 1.63<br>(1.26-2.12)                              | 0.10<br>(12/95/465)                    | 0.08<br>(12/266/1517)                          | 0.28<br>(---)                          | 0.31<br>(---)                                   | 0.07<br>(---)                          | 0.06<br>(---)                                                                         | 0.05                   | +++                                                                                     | 8.30×10 <sup>-04</sup> | ++++      |
| 12<br>121,629,420 | rs7979863  | KNTC1<br>(within gene)           | A<br>G | 0.39<br>(74/226/172)                                    | 0.32<br>(111/521/514)                     | 1.27×10 <sup>-04</sup> | 8.08×10 <sup>-05</sup> | 1.36<br>(1.16-1.59)                              | 0.33<br>(71/240/253)                   | 0.37<br>(227/869/716)                          | 0.33<br>(---)                          | 0.35<br>(---)                                   | 0.36<br>(104/336/322)                  | 0.36<br>(124/461/409)                                                                 | 3.00×10 <sup>-02</sup> | ++                                                                                      | 0.78                   | +++       |
| 13<br>45,282,832  | rs1529877  | LOC283514<br>(within gene)       | C<br>T | 0.46<br>(100/235/137)                                   | 0.39<br>(170/550/426)                     | 1.30×10 <sup>-04</sup> | 1.32×10 <sup>-04</sup> | 1.35<br>(1.16-1.57)                              | 0.40<br>(86/273/203)                   | 0.43<br>(327/858/583)                          | 0.40<br>(---)                          | 0.37<br>(---)                                   | 0.39<br>(109/379/274)                  | 0.38<br>(148/463/383)                                                                 | 0.54                   | ++                                                                                      | 0.027                  | +++       |
| 5<br>96,865,773   | rs6556983  | gene desert                      | T<br>C | 0.10<br>(7/83/382)                                      | 0.06<br>(5/134/1007)                      | 9.71×10 <sup>-05</sup> | 1.62×10 <sup>-04</sup> | 1.70<br>(1.3-2.23)                               | 0.06<br>(3/64/507)                     | 0.06<br>(8/219/1597)                           | 0.06<br>(---)                          | 0.07<br>(---)                                   | 0.07<br>(4/95/663)                     | 0.07<br>(6/137/851)                                                                   | 0.27                   | ---                                                                                     | 0.48                   | +++       |
| 8<br>117,587,454  | rs7820674  | gene desert                      | T<br>C | 0.21<br>(20/160/292)                                    | 0.16<br>(33/291/822)                      | 1.14×10 <sup>-04</sup> | 1.83×10 <sup>-04</sup> | 1.46<br>(1.2-1.77)                               | 0.16<br>(12/161/402)                   | 0.17<br>(45/538/1217)                          | 0.17<br>(---)                          | 0.18<br>(---)                                   | 0.19<br>(28/237/494)                   | 0.17<br>(26/293/674)                                                                  | 0.63                   | ++                                                                                      | 0.21                   | +++       |
| 1<br>112,456,517  | rs461311   | gene desert                      | T<br>G | 0.16<br>(14/126/332)                                    | 0.22<br>(52/410/684)                      | 1.02×10 <sup>-04</sup> | 6.97×10 <sup>-05</sup> | 0.68<br>(0.55-0.82)                              | 0.22<br>(29/188/348)                   | 0.21<br>(73/609/1103)                          | 0.25<br>(---)                          | 0.24<br>(---)                                   | 0.25<br>(43/291/428)                   | 0.24<br>(51/366/577)                                                                  | 0.14                   | +++                                                                                     | 0.72                   | +++       |
| 19<br>16,970,436  | rs4808550  | CPAMD8<br>(within gene)          | A<br>G | 0.21<br>(21/155/296)                                    | 0.15<br>(27/300/819)                      | 1.78×10 <sup>-04</sup> | 2.56×10 <sup>-04</sup> | 1.45<br>(1.19-1.75)                              | 0.17<br>(15/166/383)                   | 0.17<br>(49/526/1221)                          | 0.19<br>(50/379/848)                   | 0.17<br>(34/380/905)                            | 0.19<br>(34/216/512)                   | 0.19<br>(32/318/644)                                                                  | 0.48                   | ++                                                                                      | 0.02                   | +++       |
| 5<br>123,839,501  | rs10067065 | gene desert                      | C<br>T | 0.35<br>(50/229/193)                                    | 0.28<br>(94/458/594)                      | 1.46×10 <sup>-04</sup> | 1.86×10 <sup>-04</sup> | 1.37<br>(1.16-1.61)                              | 0.27<br>(38/233/302)                   | 0.29<br>(157/724/922)                          | 0.71<br>(---)                          | 0.71<br>(---)                                   | 0.30<br>(75/306/381)                   | 0.28<br>(94/370/530)                                                                  | 0.96                   | ++                                                                                      | 0.11                   | +++       |
| 7<br>154,099,909  | rs916514   | DPP6<br>(within gene)            | G<br>A | 0.09<br>(3/76/393)                                      | 0.14<br>(20/271/855)                      | 1.37×10 <sup>-04</sup> | 6.64×10 <sup>-05</sup> | 0.61<br>(0.47-0.79)                              | 0.09<br>(8/83/483)                     | 0.11<br>(35/337/1447)                          | 0.09<br>(---)                          | 0.11<br>(---)                                   | 0.10<br>(9/133/619)                    | 0.09<br>(7/161/826)                                                                   | 0.0496                 | ++                                                                                      | 6.03×10 <sup>-04</sup> | +++       |
| 2<br>223,040,164  | rs7604173  | SGPP2<br>(within gene)           | T<br>C | 0.47<br>(98/245/129)                                    | 0.39<br>(183/539/424)                     | 1.41×10 <sup>-04</sup> | 1.63×10 <sup>-04</sup> | 1.34<br>(1.15-1.57)                              | 0.42<br>(108/265/198)                  | 0.41<br>(308/856/620)                          | 0.40<br>(208/594/473)                  | 0.40<br>(218/623/481)                           | 0.42<br>(136/365/261)                  | 0.42<br>(173/488/333)                                                                 | 0.84                   | +++                                                                                     | 0.06                   | +++       |
| 12<br>61,590,288  | rs7962536  | PPM1H<br>(within gene)           | T<br>C | 0.19<br>(23/135/314)                                    | 0.25<br>(85/408/653)                      | 1.80×10 <sup>-04</sup> | 2.89×10 <sup>-04</sup> | 0.70<br>(0.58-0.84)                              | 0.22<br>(33/192/351)                   | 0.23<br>(112/614/1086)                         | 0.21<br>(---)                          | 0.22<br>(---)                                   | 0.21<br>(38/251/473)                   | 0.22<br>(59/328/607)                                                                  | 0.22                   | ---                                                                                     | 6.40×10 <sup>-03</sup> | ----      |
| 6<br>149,166,288  | rs959131   | UST<br>(within gene)             | C<br>T | 0.30<br>(40/206/226)                                    | 0.24<br>(68/413/665)                      | 1.83×10 <sup>-04</sup> | 2.14×10 <sup>-04</sup> | 1.38<br>(1.17-1.63)                              | 0.25<br>(35/216/322)                   | 0.24<br>(103/675/1029)                         | 0.26<br>(---)                          | 0.26<br>(---)                                   | 0.26<br>(55/287/420)                   | 0.27<br>(66/396/531)                                                                  | 0.72                   | ++                                                                                      | 0.05                   | +++       |
| 11<br>102,081,585 | rs1939015  | MMP27<br>(within gene)           | G<br>A | 0.12<br>(6/97/369)                                      | 0.16<br>(25/315/806)                      | 1.56×10 <sup>-03</sup> | 9.78×10 <sup>-04</sup> | 0.69<br>(0.55-0.87)                              | 0.14<br>(8/144/415)                    | 0.14<br>(35/440/1317)                          | 0.15<br>(---)                          | 0.17<br>(---)                                   | 0.17<br>(25/213/524)                   | 0.20<br>(49/296/649)                                                                  | 0.026                  | ---                                                                                     | 7.09×10 <sup>-04</sup> | ----      |

**Supplementary Table 3. eQTL analysis.** SNP-expression associations were tested separately in normal skin (NN; n=57), in uninvolved skin (PN; n=53), and in involved skin (PP; n=53). For this analysis, cis-associations were tested between each transcript (i.e. probe) of *TRAF3IP2* and other proteins and the accordant two SNPs (rs13210247 and rs33980500). Specifically, we used the score test in Merlin (*fastassoc* option) to test the association. For genotyped SNPs, the number of copies of one allele was modeled. For imputed SNPs, the dosage (i.e. the expected number of copies) of one allele was modelled. After correcting for multiple testing by Bonferroni (corrected significance threshold of  $\alpha=7.610^{-4}$  [0.05/66]) no significant association could be detected. The two tested SNPs were not correlated with the expression of the corresponding genes.

| SNP        | Gene            | Affymetrix probe | eQTL <i>P</i> -value |                 |               |
|------------|-----------------|------------------|----------------------|-----------------|---------------|
|            |                 |                  | NN (Normal)          | PN (Uninvolved) | (PP) Involved |
| rs13210247 | <i>TRAF3IP2</i> | 202987_at        | 0.14                 | 0.07            | 0.63          |
|            |                 | 215411_s_at      | 0.66                 | 0.31            | 0.21          |
| rs33980500 | <i>TRAF3IP2</i> | 202987_at        | 0.026                | 0.12            | 0.02          |
|            |                 | 215411_s_at      | 0.62                 | 0.28            | 0.18          |
|            | <i>TRAF1</i>    | 205599_at        | 0.71                 | 0.40            | 0.043         |
|            |                 | 235116_at        | 0.55                 | 0.045           | 0.11          |
|            | <i>TRAF2</i>    | 204413_at        | 0.088                | 0.16            | 0.12          |
|            | <i>TRAF3</i>    | 208315_x_at      | 0.55                 | 0.90            | 0.093         |
|            |                 | 221571_at        | 0.23                 | 0.32            | 0.24          |
|            | <i>TRAF4</i>    | 202871_at        | 0.89                 | 0.97            | 3.13E-03      |
|            |                 | 211899_s_at      | 0.21                 | 0.89            | 0.11          |
|            |                 | 242473_at        | 0.32                 | 0.14            | 0.62          |
|            | <i>TRAF5</i>    | 1569861_at       | 0.53                 | 0.70            | 7.32E-03      |
|            |                 | 204352_at        | 0.96                 | 0.090           | 0.13          |
|            | <i>TRAF6</i>    | 205558_at        | 0.30                 | 0.15            | 0.98          |
|            | <i>TRAF7</i>    | 223029_s_at      | 0.96                 | 0.33            | 0.15          |
|            |                 | 223030_at        | 0.55                 | 3.91E-03        | 0.55          |
|            |                 | 223031_s_at      | 0.81                 | 0.93            | 0.38          |
|            | <i>IKBKB</i>    | 209341_s_at      | 0.13                 | 0.13            | 0.52          |
|            |                 | 209342_s_at      | 0.25                 | 0.12            | 0.90          |
|            |                 | 211027_s_at      | 0.52                 | 0.22            | 0.29          |
|            | <i>IKBKG</i>    | 209929_s_at      | 0.26                 | 0.89            | 0.47          |
|            |                 | 36004_at         | 0.98                 | 0.17            | 0.82          |
|            | <i>NFKB1</i>    | 209239_at        | 0.74                 | 0.73            | 0.16          |
|            |                 | 239876_at        | 0.04                 | 0.96            | 0.62          |
|            | <i>NFKB2</i>    | 207535_s_at      | 0.90                 | 0.85            | 0.59          |
|            |                 | 209636_at        | 0.68                 | 0.24            | 0.81          |
|            |                 | 211524_at        | 0.76                 | 0.99            | 0.89          |
|            | <i>NFKBIA</i>   | 201502_s_at      | 0.43                 | 0.63            | 0.10          |
|            |                 | 231699_at        | 0.18                 | 0.13            | 0.71          |
|            | <i>NFKBIB</i>   | 214062_x_at      | 0.14                 | 0.83            | 0.53          |
|            |                 | 214448_x_at      | 0.30                 | 0.60            | 0.64          |
|            |                 | 228388_at        | 0.87                 | 0.22            | 0.26          |
